# Supplementary material
Source: PubMed Central journal article supplement (PMC4048934)

## *Supporting Information*

### **Structural Determinants for ERK5 (MAPK7) and Leucine Rich Repeat Kinase 2 Activities of benzo[e]pyrimido-[5,4-b]diazepine-6(11H)-ones.**

Xianming Deng<sup>1</sup>, Jonathan M. Elkins<sup>2</sup>, Jinwei Zhang<sup>3</sup>, Qingkai Yang<sup>4</sup>, Tatiana Erazo<sup>5</sup>, Nestor Gomez<sup>5</sup>, Hwan Geun Choi<sup>1</sup>, Jinhua Wang<sup>1</sup>, Nicolas Dzamko<sup>3</sup>, Jiing-Dwan Lee<sup>4</sup>, Taebo Sim<sup>6</sup>, NamDoo Kim<sup>6</sup>, Dario R. Alessi<sup>3</sup>, Jose M Lizcano<sup>5</sup>, Stefan Knapp<sup>2</sup> and Nathanael S. Gray<sup>1\*</sup>

<sup>1</sup> *Department of Cancer Biology, Dana-Farber Cancer Institute, and Department of Biological Chemistry & Molecular Pharmacology, Harvard Medical School, 250 Longwood Ave, SGM 628, Boston, MA 02115, USA.* <sup>2</sup> *Structural Genomics Consortium, Nuffield Department of Clinical Medicine and Target Discovery Institute (TDI), University of Oxford, Oxford, UK.* <sup>3</sup> *MRC Protein Phosphorylation Unit, College of Life Sciences, University of Dundee, Dow Street, Dundee DD1 5EH, Scotland.* <sup>4</sup> *Department of Immunology and Microbial Science, The Scripps Research Institute, 10550 North Torrey Pines Road, La Jolla, CA 92037, USA.* <sup>5</sup> *Institut de Neurociències, Departament de Bioquímica i Biologia Molecular, Universitat Autònoma de Barcelona, E-08193 Barcelona, Spain.* <sup>6</sup> *Future Convergence Research Division, Korea institute of Science and Technology, 39-1 Hawologok-Dong, Wolsong-Gil5, Seongbuk-Gu, Seoul, 136-791, Korea.*

*\* To whom correspondence should be addressed. For N.S.G.: phone, 1-617-582-8590; fax, 1-617-582-8615; E-mail, Nathanael\_Gray@dfci.harvard.edu .*

#### **Contents**

|                                                                                                |    |
|------------------------------------------------------------------------------------------------|----|
| 1. Spectral data of compounds <b>9</b> , <b>10</b> , <b>12</b> , <b>24</b> and <b>26</b> ..... | S2 |
| 2. Scatter plot of the cellular results and the enzymatic results against MAPK7.....           | S5 |
| 3. Representative <sup>1</sup> H NMR and <sup>13</sup> C NMR spectra.....                      | S7 |

## 1. Spectral data of compounds 9, 10, 12 and 24.

Compounds 9, 10, 12 and 24 were synthesized by the previous procedures[1].

### 2-((2-(1H-imidazol-5-yl)ethyl)amino)-5,11-dimethyl-5H-benzo[e]pyrimido[5,4-b][1,4]-diazepin-6(11H)-one (9)

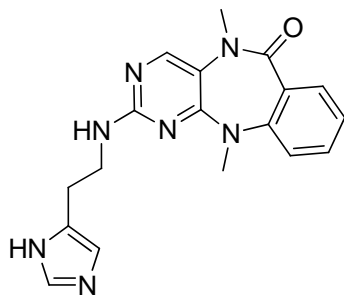

$^1\text{H}$  NMR (600 MHz,  $\text{CD}_3\text{OD}$ )  $\delta$  8.07 (s, 1H), 7.70 (dd,  $J = 1.8, 7.8$  Hz, 1H), 7.65 (s, 1H), 7.46 (dt,  $J = 1.8, 7.8$  Hz, 1H), 7.16 (d,  $J = 8.4$  Hz, 1H), 7.13 (t,  $J = 7.8$  Hz, 1H), 6.86 (s, 1H), 3.61 (t,  $J = 7.2$  Hz, 2H), 3.41 (s, 3H), 3.31 (s, 3H), 2.88 (t,  $J = 7.2$  Hz, 2H).

$^{13}\text{C}$  NMR (100 MHz,  $\text{DMSO-d}_6$ )  $\delta$  167.8, 159.3, 152.8, 149.9, 135.0, 132.7, 132.0, 116.6, 113.9, 108.0, 41.5, 38.0, 35.5, 26.6. MS (ESI)  $m/z$  350 ( $\text{M}+\text{H}$ ) $^+$ , HRMS (ESI)  $m/z$  calc. 350.1729, measured 350.1721 ( $\text{M}+\text{H}$ ) $^+$ .

### 5,11-dimethyl-2-((1-methylpiperidin-4-yl)amino)-5H-benzo[e]pyrimido[5,4-b][1,4]-diazepin-6(11H)-one (10)

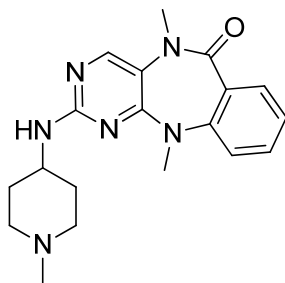

$^1\text{H}$  NMR (600 MHz,  $\text{CD}_3\text{OD}$ )  $\delta$  8.14 (s, 1H), 7.78 (d,  $J = 7.8$  Hz, 1H), 7.56 (t,  $J = 7.8$  Hz, 1H), 7.28-7.24 (m, 2H), 4.16 (brs, 1H), 3.62 (d,  $J = 12.0$  Hz, 2H), 3.47 (s, 3H), 3.44 (s, 3H), 3.20 (t,  $J = 12.6$  Hz, 2H), 2.91 (s, 3H), 2.34 (d,  $J = 13.2$  Hz, 2H), 1.87 (q,  $J = 13.2$  Hz, 2H).

$^{13}\text{C}$  NMR (100 MHz,  $\text{DMSO-d}_6$ )  $\delta$  167.5, 158.8, 158.4, 158.1, 152.4, 149.7, 132.8, 132.1, 126.7, 123.8, 118.0, 53.3, 43.0, 40.9, 37.9, 35.7, 29.4. MS (ESI)  $m/z$  353 ( $\text{M}+\text{H}$ ) $^+$ . HRMS (ESI)  $m/z$  calc. 353.2090, measured 353.2102 ( $\text{M}+\text{H}$ ) $^+$ .

**2-((4-(4-hydroxypiperidin-1-yl)-2-isopropoxyphenyl)amino)-5,11-dimethyl-5H-benzo[e]pyrimido[5,4-b][1,4]diazepin-6(1H)-one (12)**

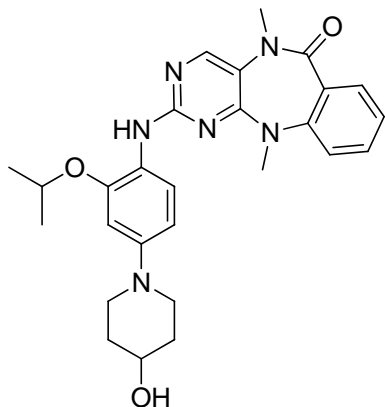

$^1\text{H}$  NMR (600 MHz,  $\text{CD}_3\text{OD}$ )  $\delta$  8.17 (s, 1H), 8.12 (d,  $J = 9.0$  Hz, 1H), 7.71 (dd,  $J = 1.2, 7.8$  Hz, 1H), 7.45 (dt,  $J = 1.8, 7.8$  Hz, 1H), 7.17 (d,  $J = 8.4$  Hz, 1H), 7.13 (t,  $J = 7.8$  Hz, 1H), 6.67 (d,  $J = 2.4$  Hz, 1H), 6.60 (dd,  $J = 3.0, 9.0$  Hz, 1H), 4.64-4.60 (m, 1H), 3.74-3.70 (m, 1H), 3.48-3.44 (m, 2H), 3.43 (s, 3H), 3.36 (s, 3H), 2.84-2.80 (m, 2H), 1.97-1.95 (m, 2H), 1.69-1.63 (m, 2H), 1.33 (d,  $J = 6.6$  Hz, 6H).

$^{13}\text{C}$  NMR (100 MHz,  $\text{DMSO-d}_6$ )  $\delta$  167.5, 163.5, 156.6, 152.7, 149.8, 149.5, 148.1, 132.8, 132.1, 126.7, 123.8, 121.9, 121.6, 120.4, 118.2, 108.2, 103.6, 71.2, 66.5, 47.7, 39.9, 36.0, 34.4, 22.3. MS (ESI)  $m/z$  489 ( $\text{M}+\text{H}$ ) $^+$ . HRMS (ESI)  $m/z$  calc. 489.2614, measured 489.2614 ( $\text{M}+\text{H}$ ) $^+$ .

**2-((2-methoxy-4-(4-(4-methylpiperazin-1-yl)piperidine-1-carbonyl)phenyl)amino)-5-methyl-10,11-dihydropyrimido[4',5':2,3][1,4]diazepino[6,7,1-hi]indol-6(5H)-one (24)**

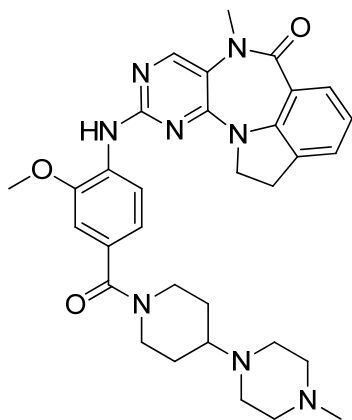

$^1\text{H}$  NMR (600 MHz,  $\text{CD}_3\text{OD}$ )  $\delta$  8.11 (d,  $J = 8.4$  Hz, 1H), 7.99 (s, 1H), 7.88 (d,  $J = 7.2$  Hz, 1H), 7.44 (dd,  $J = 1.2, 7.8$  Hz, 1H), 7.16 (d,  $J = 1.2$  Hz, 1H), 7.14-7.11 (m, 2H), 4.70 (brs, 1H), 4.39

(t,  $J = 8.4$  Hz, 2H), 3.96 (s, 3H), 3.55-3.45 (m, 4H), 3.41 (s, 3H), 3.40-3.32 (m, 6H), 3.25-3.21 (m, 4H), 2.65 (s, 3H), 2.20-1.95 (m, 2H), 1.75-1.65 (m, 2H).

$^{13}\text{C}$  NMR (100 MHz, DMSO- $d_6$ )  $\delta$  169.2, 166.7, 159.3, 158.7, 158.3, 155.3, 151.4, 148.5, 147.6, 133.2, 130.3, 129.4, 123.0, 119.9, 119.4, 119.2, 118.7, 110.3, 61.5, 58.5, 56.7, 47.6, 46.4, 43.8, 43.2, 41.8, 38.9, 26.8. MS (ESI)  $m/z$  583 (M+H) $^+$ . HRMS (ESI)  $m/z$  calc. 583.3145, measured 583.3143 (M+H) $^+$ .

Compound **26** was synthesized by the same procedures as the preparation of compound **25**.

**11-cyclopentyl-2-((2-ethoxy-4-(4-(4-methylpiperazin-1-yl)piperidine-1-carbonyl)-phenyl)amino)-5-methyl-5H-benzo[e]pyrimido[5,4-b][1,4]diazepin-6(11H)-one (26)**

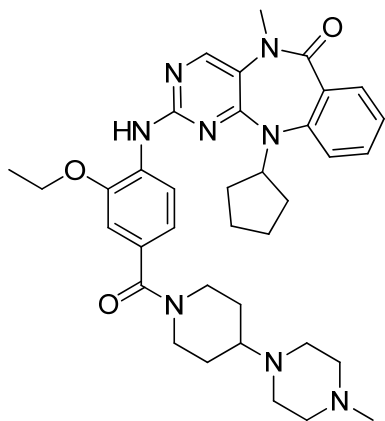

$^1\text{H}$  NMR (600 MHz,  $\text{CD}_3\text{OD}$ )  $\delta$  8.49 (d,  $J = 8.4$  Hz, 1H), 8.36 (s, 1H), 7.64 (dd,  $J = 1.8, 7.8$  Hz, 1H), 7.48-7.45 (m, 1H), 7.27 (d,  $J = 8.4$  Hz, 1H), 7.18 (t,  $J = 7.8$  Hz, 1H), 7.08-7.07 (m, 2H), 4.82-4.78 (m, 1H), 4.19 (q,  $J = 7.2$  Hz, 2H), 3.55-3.48 (m, 6H), 3.45-3.30 (m, 9H), 3.29-3.25 (m, 2H), 2.93 (s, 3H), 2.36-2.33 (m, 1H), 2.15-2.10 (m, 3H), 1.70-1.57 (m, 6H), 1.56-1.54 (m, 1H), 1.47 (t,  $J = 7.2$  Hz, 3H).

$^{13}\text{C}$  NMR (100 MHz, DMSO- $d_6$ )  $\delta$  169.3, 167.7, 164.2, 158.7, 156.1, 152.6, 149.6, 147.8, 132.3, 131.2, 130.3, 128.7, 124.5, 123.7, 121.6, 119.7, 118.9, 110.9, 64.7, 61.3, 57.1, 52.6, 46.3, 42.5, 37.2, 33.1, 32.2, 24.7, 24.5, 15.1. MS (ESI)  $m/z$  639 (M+H) $^+$ . HRMS (ESI)  $m/z$  calc. 639.3771, measured 639.3770 (M+H) $^+$ .

2. Scatter plot of the cellular results and the enzymatic results against MAPK7 (Fig. S1). Each dot represent the compound, the number correlate with the compound ID. The coordinate of X-axis means the *in vitro* enzymatic IC<sub>50</sub> of ERK5, and the coordinate of Y-axis means the cellular EC<sub>50</sub> value for inhibiting epidermal growth factor induced ERK5 autophosphorylation.

a)

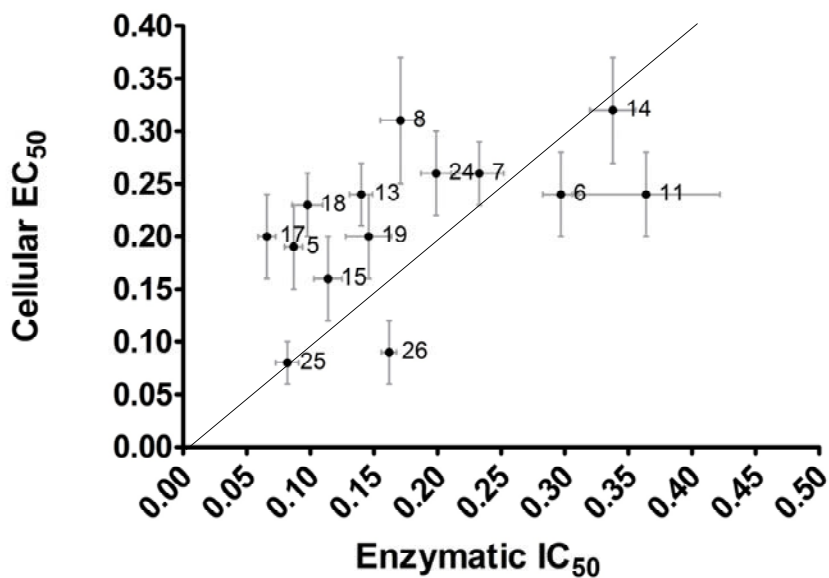

b)

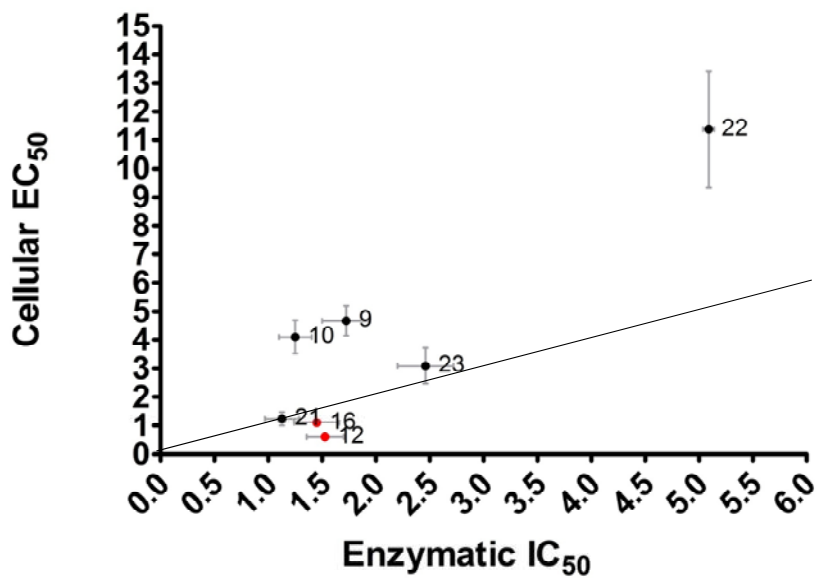

## References

- [1] Deng, X.; Yang, Q.; Kwiatkowski, N.; Sim, T.; McDermott, U.; Settleman, J. E.; Lee, J. D.; Gray, N. S. Discovery of a benzo[e]pyrimido-[5,4-b][1,4]diazepin-6(11H)-one as a Potent and Selective Inhibitor of Big MAP Kinase 1. *ACS Med. Chem. Lett.* **2011**, 2, 195-200.

$^1\text{H}$  NMR for compound 25

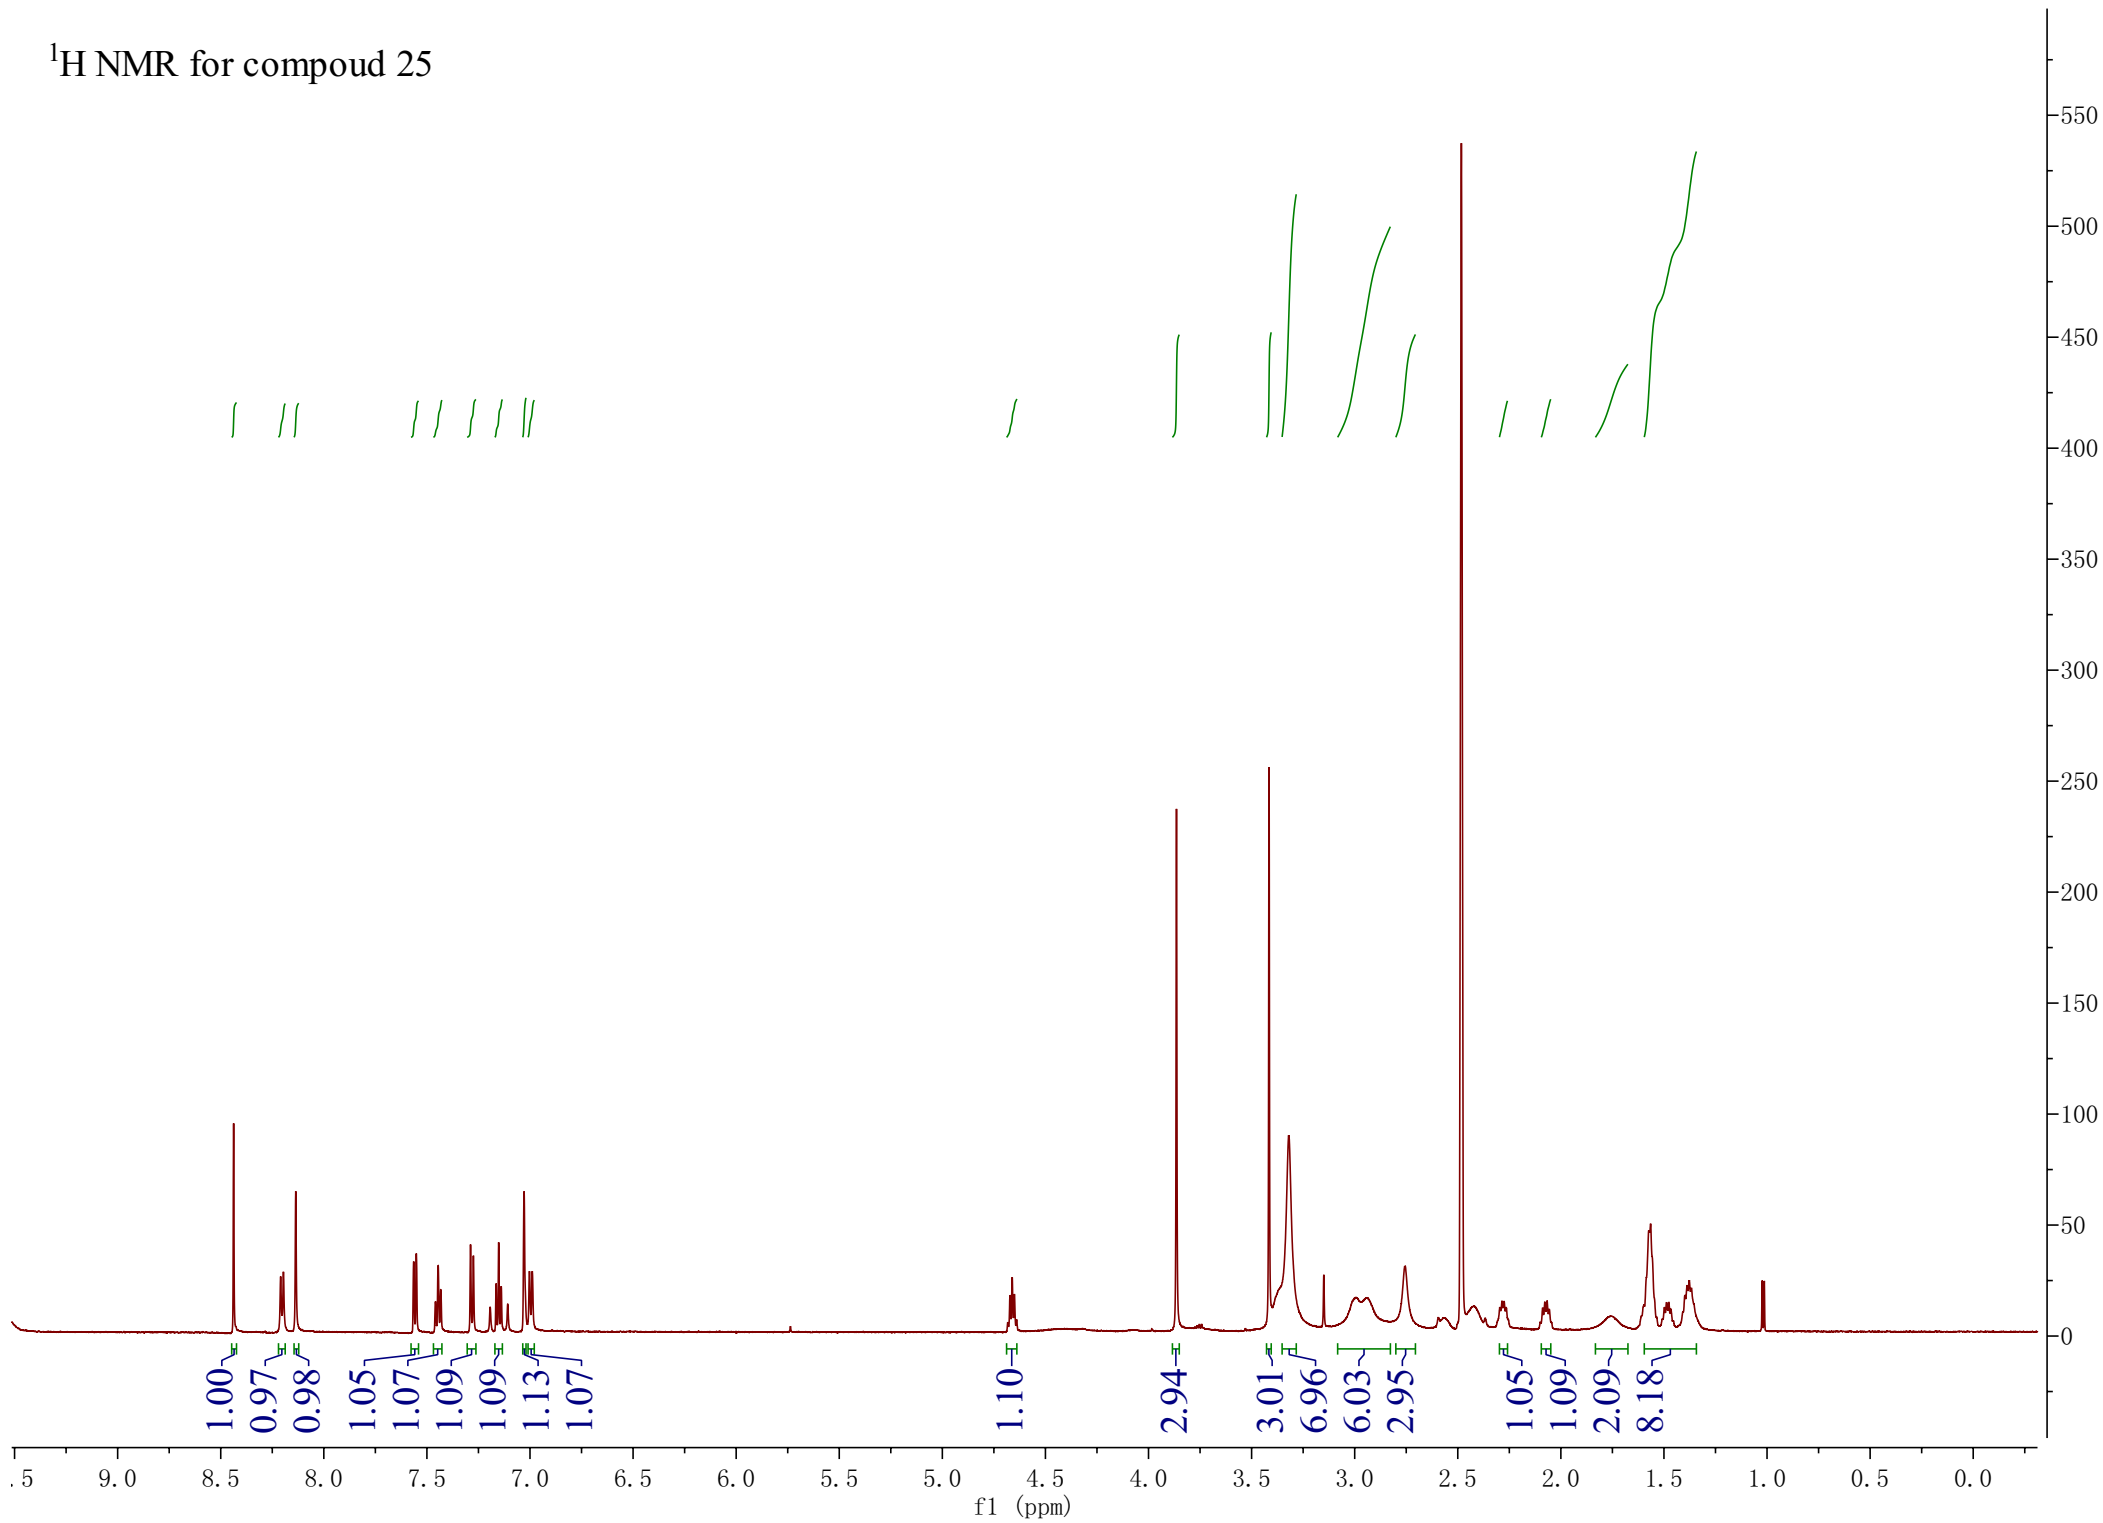

XMD17-26

exp1 CARBON

Compound 25

| SAMPLE              |                | PRESATURATION |          |
|---------------------|----------------|---------------|----------|
| date                | Mar 26 2013    | satmode       | n        |
| solvent             | dmsd           | wet           | n        |
| file                | /home/walkup1- | SPECIAL       |          |
| /vmarsys/data/wang~ | temp           | 25.0          |          |
| 5/XMD17-26_2013032~ | gain           | 30            |          |
| 6_01/XMD17-26_2013~ | spin           | not used      |          |
| 0327_CARBON_01.fid  | hst            | 0.008         |          |
| ACQUISITION         |                | pw90          | 6.800    |
| sw                  | 25510.2        | alfa          | 10.000   |
| at                  | 1.285          | FLAGS         |          |
| np                  | 65536          | il            | n        |
| fb                  | 17000          | in            | n        |
| bs                  | 64             | dp            | y        |
| d1                  | 1.000          | hs            | nn       |
| nt                  | 10500          | PROCESSING    |          |
| ct                  | 10500          | lb            | 0.50     |
| TRANSMITTER         |                | fn            | not used |
| tn                  | C13            | DISPLAY       |          |
| sfrq                | 100.498        | sp            | -1700.8  |
| tof                 | 1530.1         | wp            | 25509.4  |
| tpwr                | 60             | rfl           | 1701.6   |
| pw                  | 3.400          | rfp           | 0        |
| DECOUPLER           |                | rp            | -116.0   |
| dn                  | H1             | lp            | 0        |
| dof                 | 0              | PLOT          |          |
| dm                  | yyy            | wc            | 250      |
| decwave             | w              | sc            | 0        |
| dpwr                | 38             | vs            | 960391   |
| dmf                 | 10020          | th            | 6        |
|                     | ai             | ph            |          |

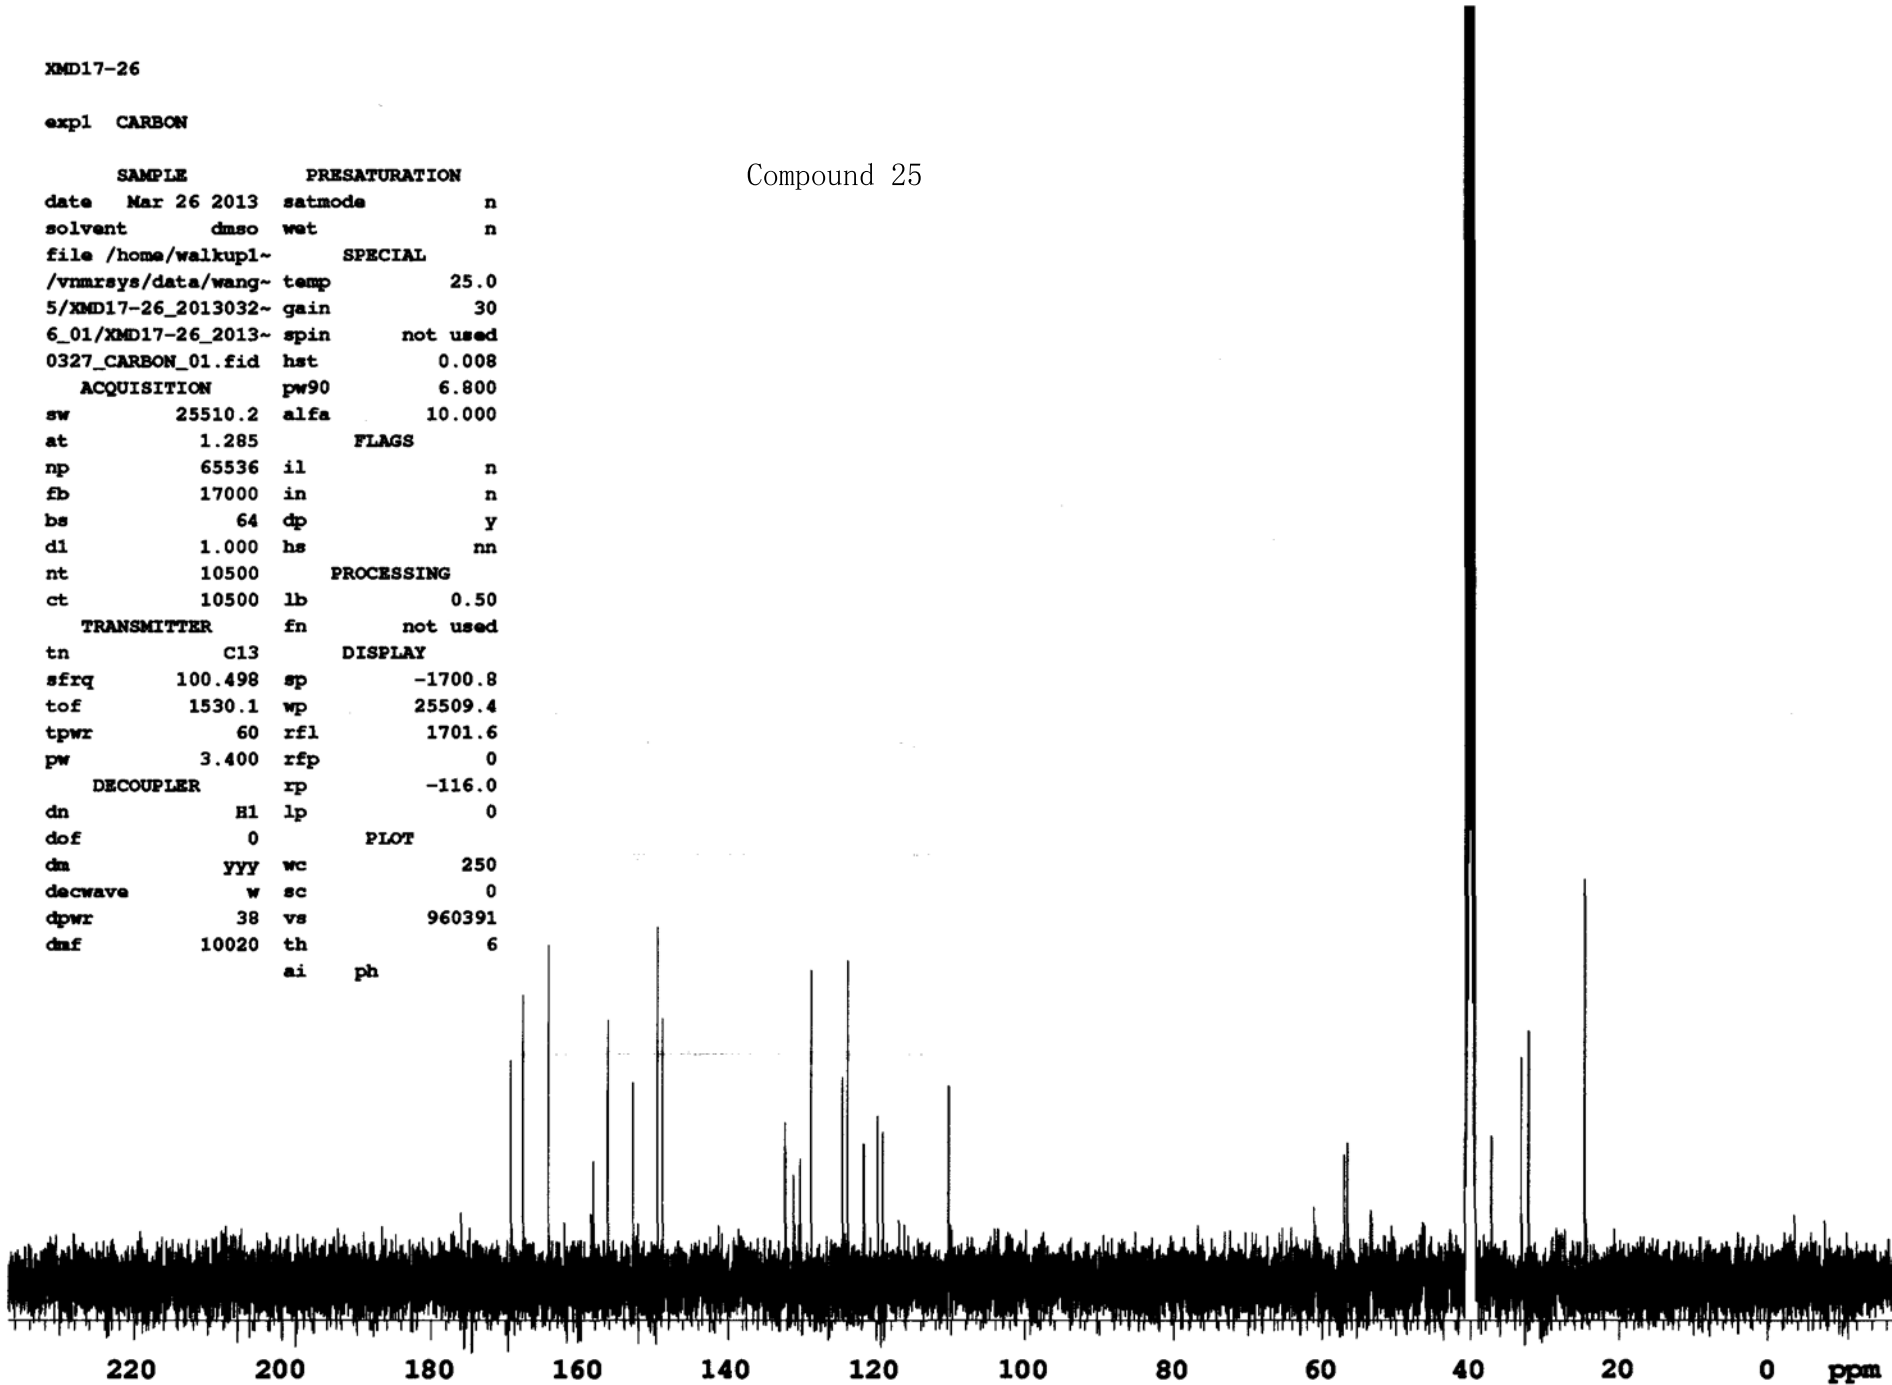



<sup>1</sup>H NMR for compound 9

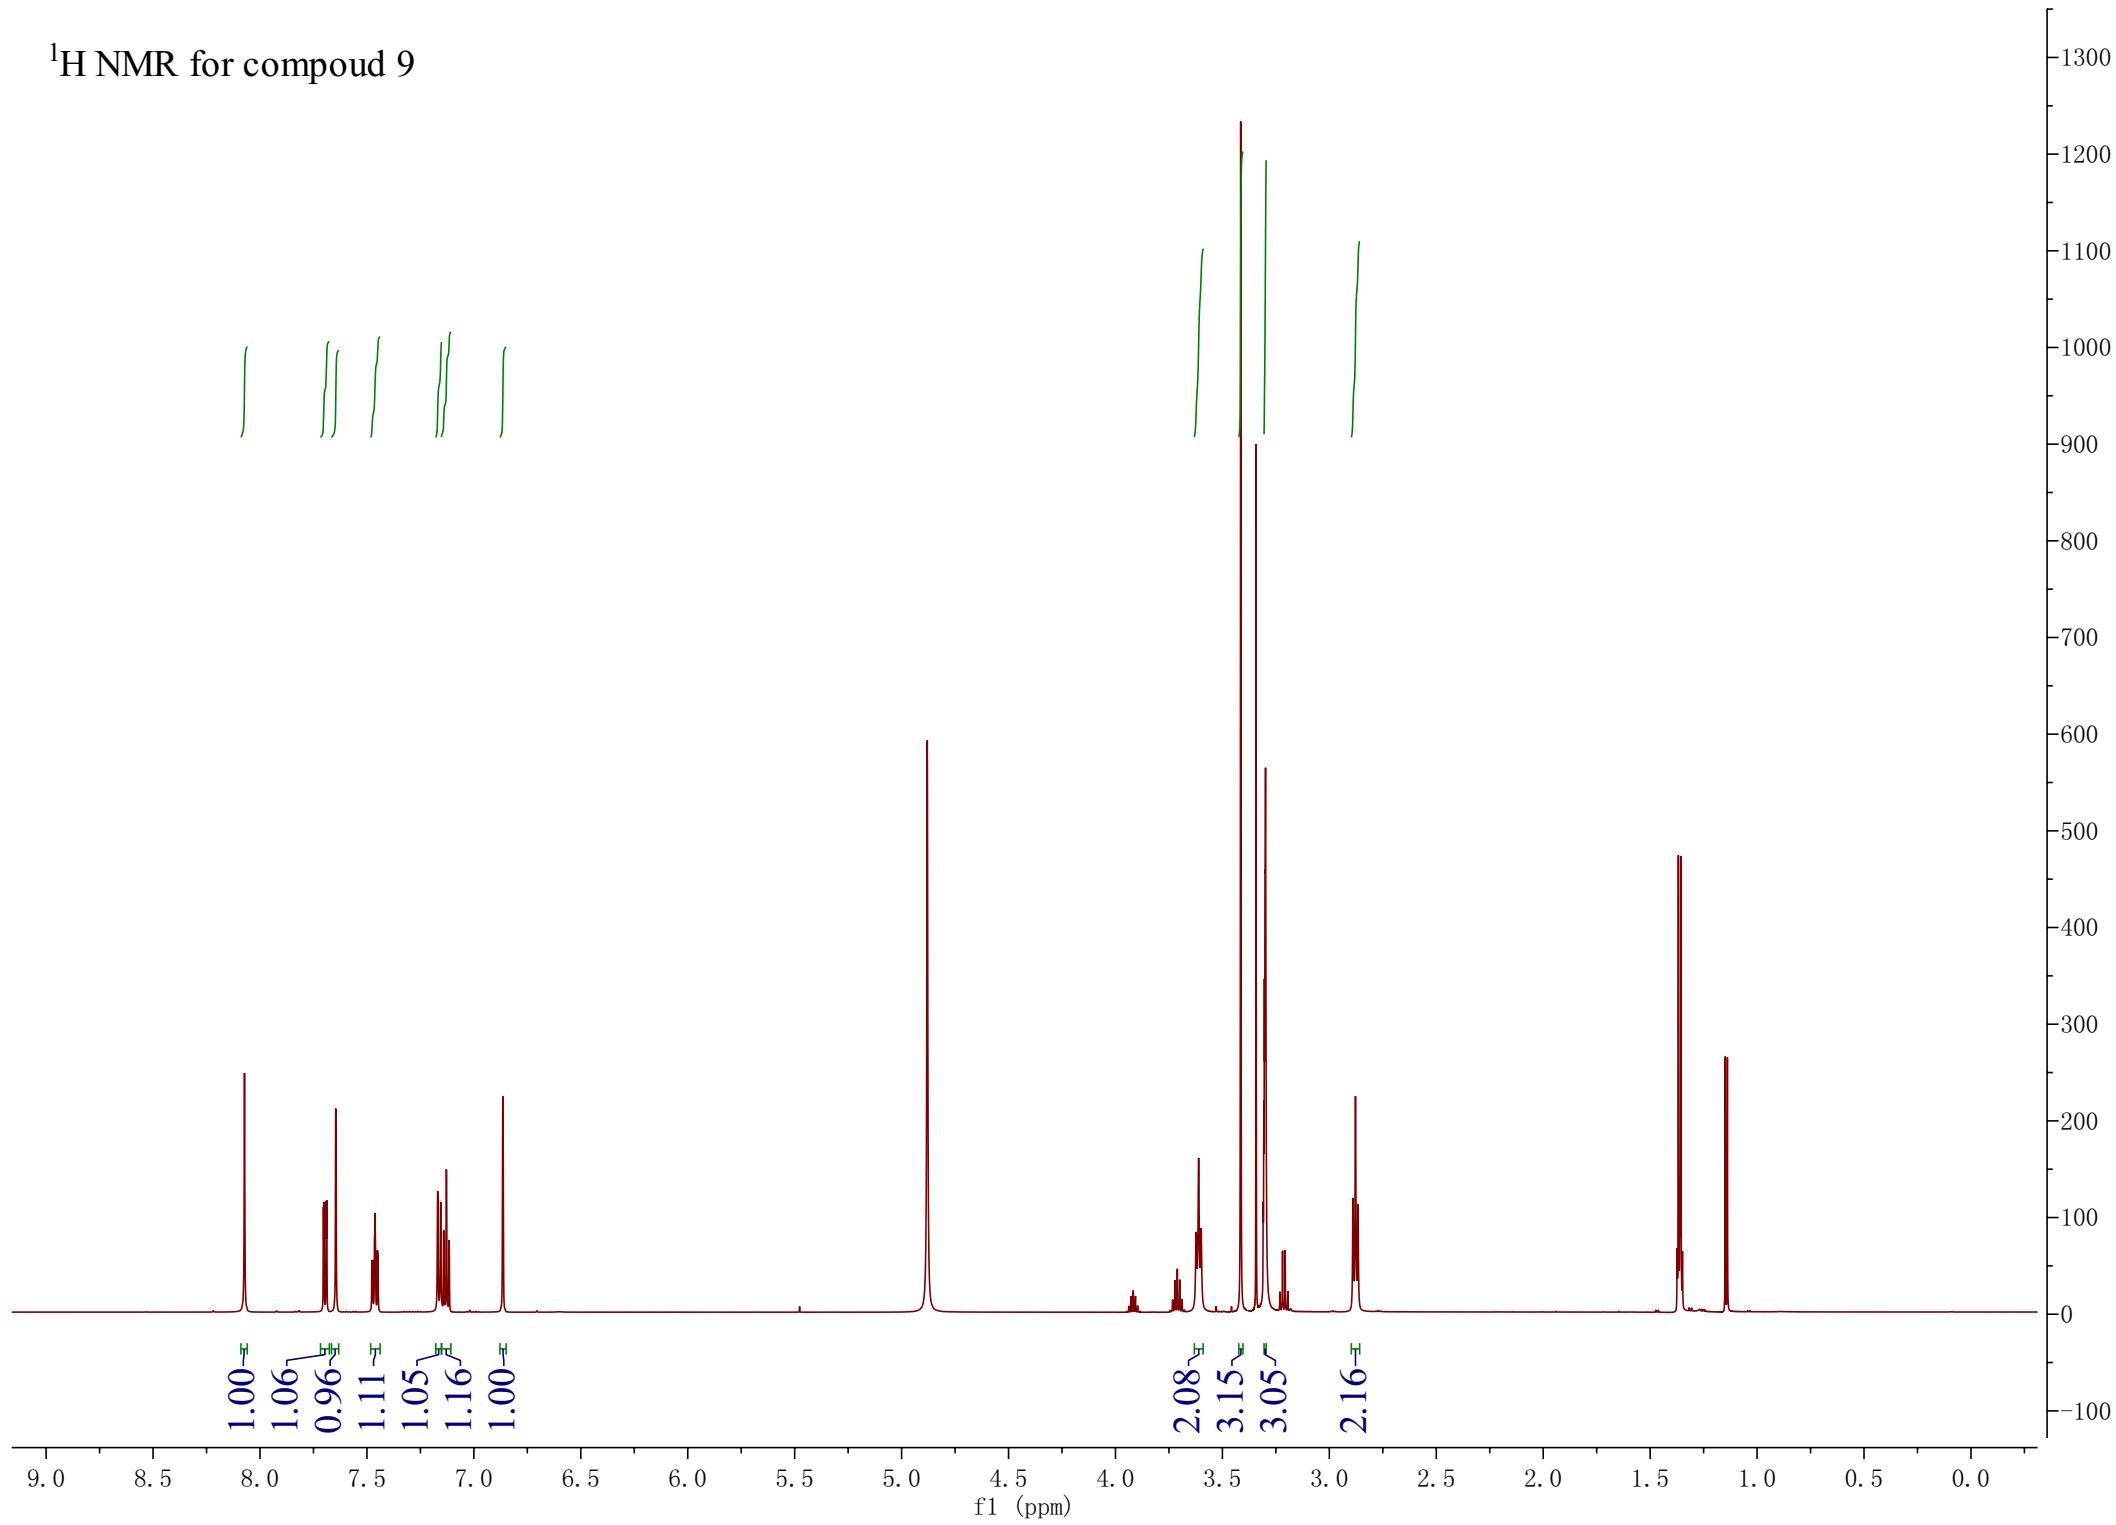

XMD17-88

Compound 9

expl CARBON

| SAMPLE              |                | PRESATURATION |         |
|---------------------|----------------|---------------|---------|
| date                | Mar 26 2013    | satmode       | n       |
| solvent             | dmsc           | wet           | n       |
| file                | /home/walkup1~ | SPECIAL       |         |
| /vnmrsys/data/wang~ | temp           | 25.0          |         |
| 5/XMD17-88_2013032~ | gain           | 30            |         |
| 6_01/XMD17-88_2013~ | spin           | not used      |         |
| 0326_CARBON_01.fid  | hst            | 0.008         |         |
| ACQUISITION         | pw90           | 6.800         |         |
| sw                  | 25510.2        | alfa          | 10.000  |
| at                  | 1.285          | FLAGS         |         |
| np                  | 65536          | il            | n       |
| fb                  | 17000          | in            | n       |
| bs                  | 64             | dp            | y       |
| d1                  | 1.000          | hs            | nm      |
| nt                  | 10500          | PROCESSING    |         |
| ct                  | 10500          | lb            | 0.50    |
| TRANSMITTER         | fn             | not used      |         |
| tn                  | C13            | DISPLAY       |         |
| sfrq                | 100.498        | sp            | -1700.8 |
| tof                 | 1530.1         | wp            | 25509.4 |
| tpwr                | 60             | rfl           | 1701.6  |
| pw                  | 3.400          | rfp           | 0       |
| DECOUPLER           | rp             | -138.7        |         |
| dn                  | H1             | lp            | 78.5    |
| dof                 | 0              | PLOT          |         |
| dn                  | yyy            | wc            | 250     |
| decwave             | w              | sc            | 0       |
| dpwr                | 38             | vs            | 742948  |
| dmf                 | 10020          | th            | 26      |
|                     | ai             | ph            |         |

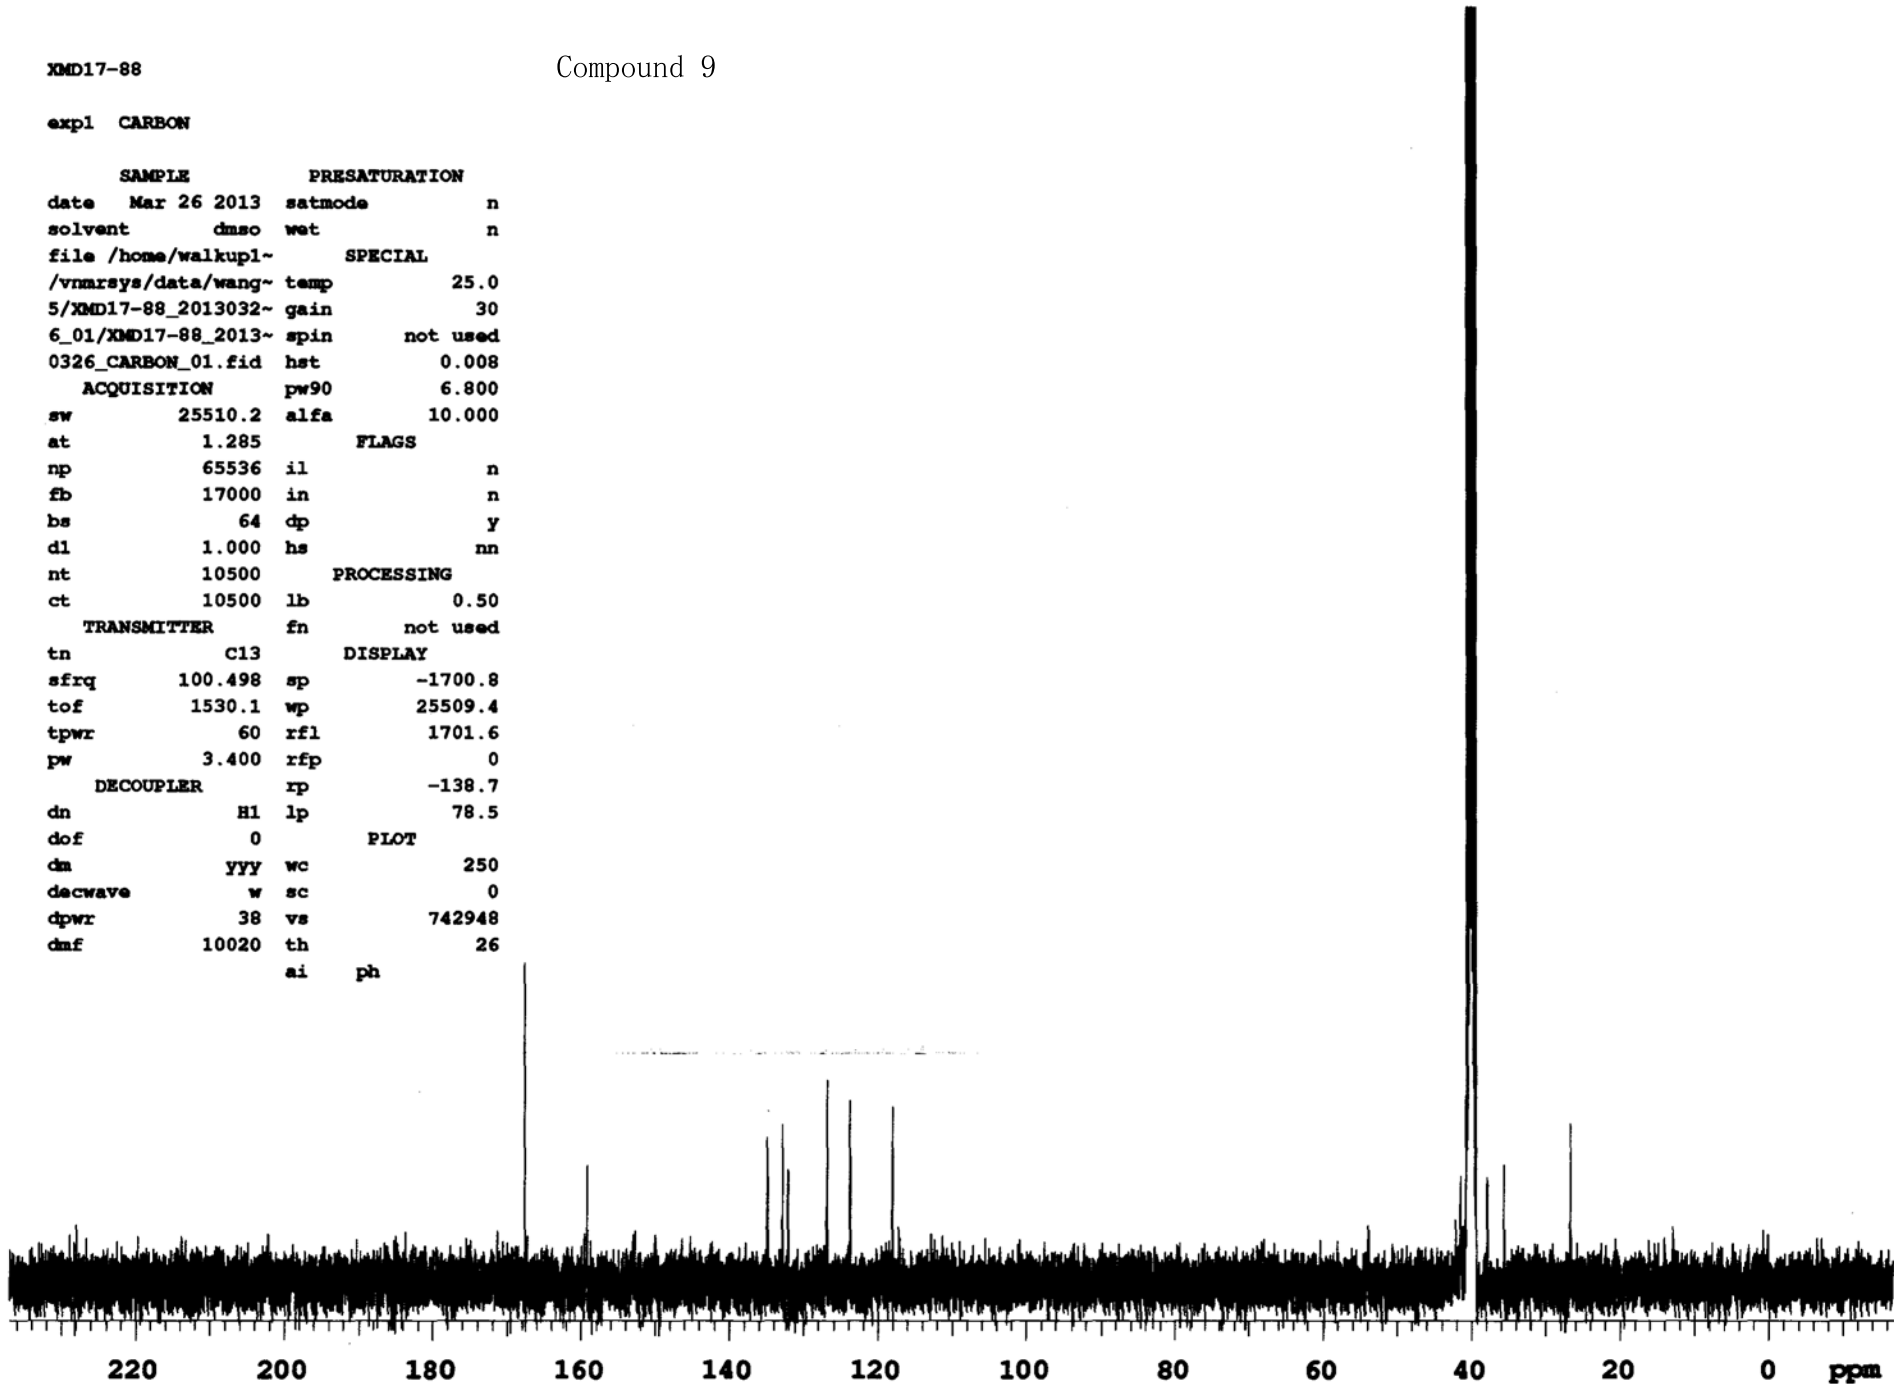

$^1\text{H}$  NMR for compound 10

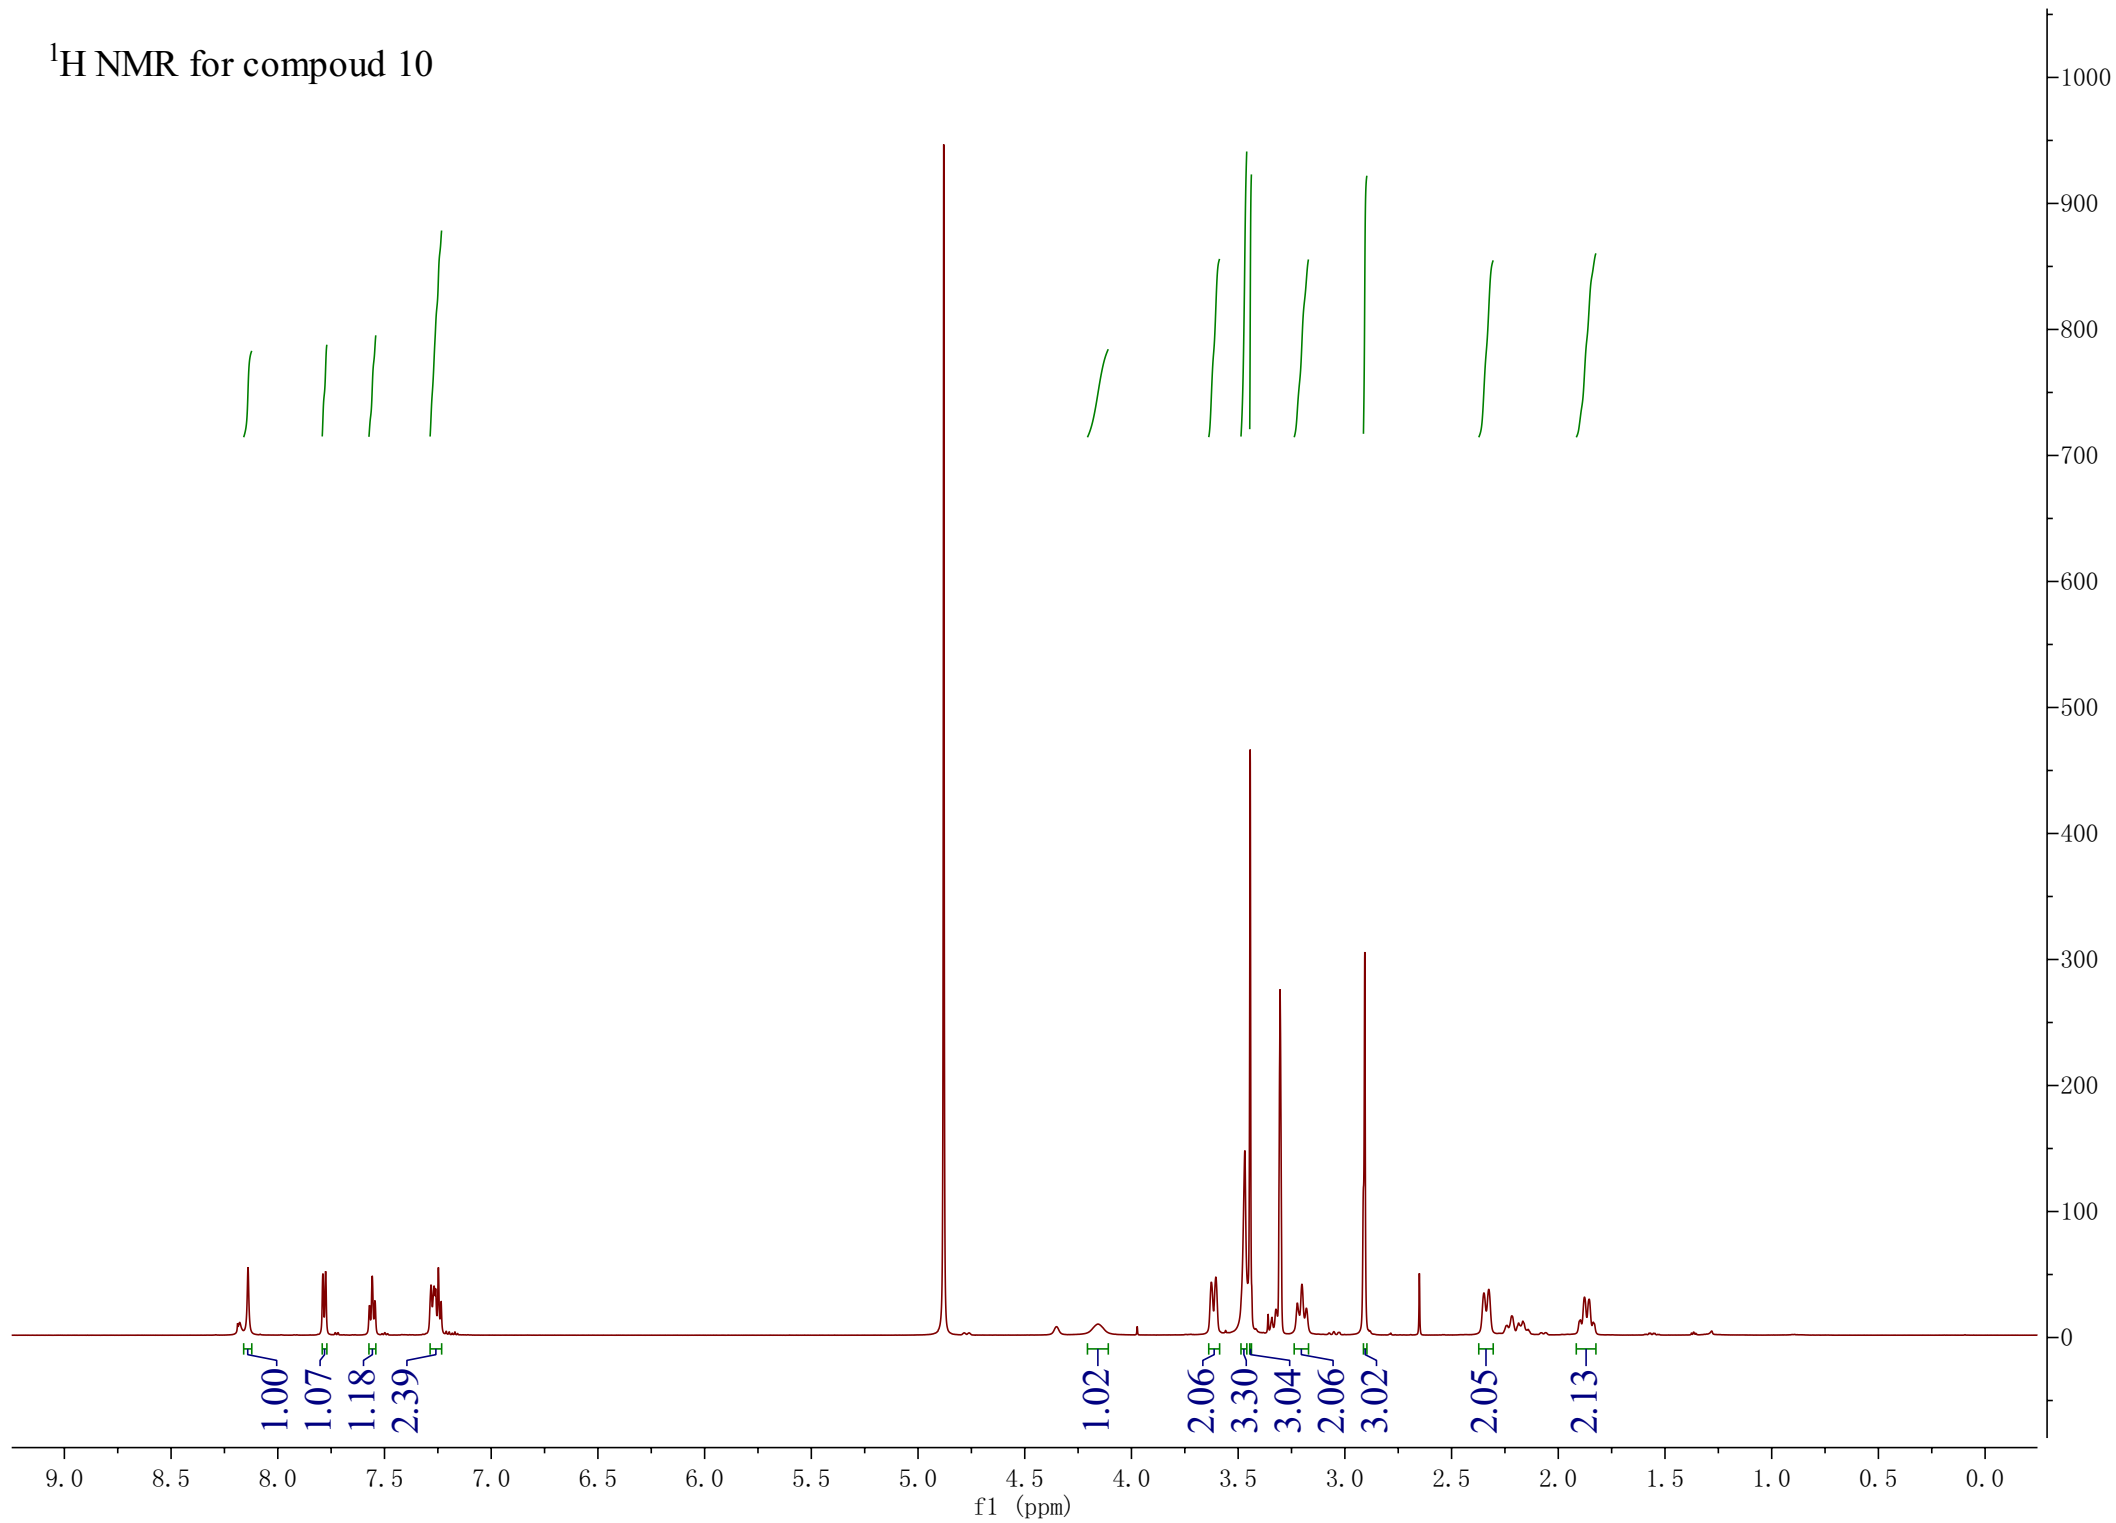

xmd17-89

Compound 10

exp1 CARBON

| SAMPLE              |                | PRESATURATION |          |
|---------------------|----------------|---------------|----------|
| date                | Apr 1 2013     | satmode       | n        |
| solvent             | dmsc           | wet           | n        |
| file                | /home/walkup1- | SPECIAL       |          |
| /vmarsys/data/wang~ | temp           | 25.0          |          |
| 5/xmd17-89_2013040~ | gain           | 30            |          |
| 1_01/xmd17-89_2013~ | spin           | not used      |          |
| 0402_CARBON_01.fid  | hst            | 0.0085        |          |
| ACQUISITION         |                | pw90          | 6.806    |
| sw                  | 25510.2        | alfa          | 10.000   |
| at                  | 1.285          | FLAGS         |          |
| np                  | 65536          | il            | n        |
| fb                  | 17000          | in            | n        |
| bs                  | 64             | dp            | y        |
| dl                  | 1.000          | hs            | nh       |
| nt                  | 20000          | PROCESSING    |          |
| ct                  | 20000          | lb            | 0.50     |
| TRANSMITTER         |                | fn            | not used |
| tn                  | C13            | DISPLAY       |          |
| sfrq                | 100.498        | sp            | -1700.8  |
| tof                 | 1530.1         | wp            | 25509.4  |
| tpwr                | 60             | rfl           | 1701.6   |
| pw                  | 3.400          | rfp           | 0        |
| DECOUPLER           |                | rp            | -118.8   |
| dn                  | H1             | lp            | 0        |
| dof                 | 0              | PLOT          |          |
| dn                  | yyy            | wc            | 250      |
| decwave             | w              | sc            | 0        |
| dpwr                | 38             | vs            | 628361   |
| dmf                 | 10020          | th            | 13       |
|                     |                | ai            | ph       |

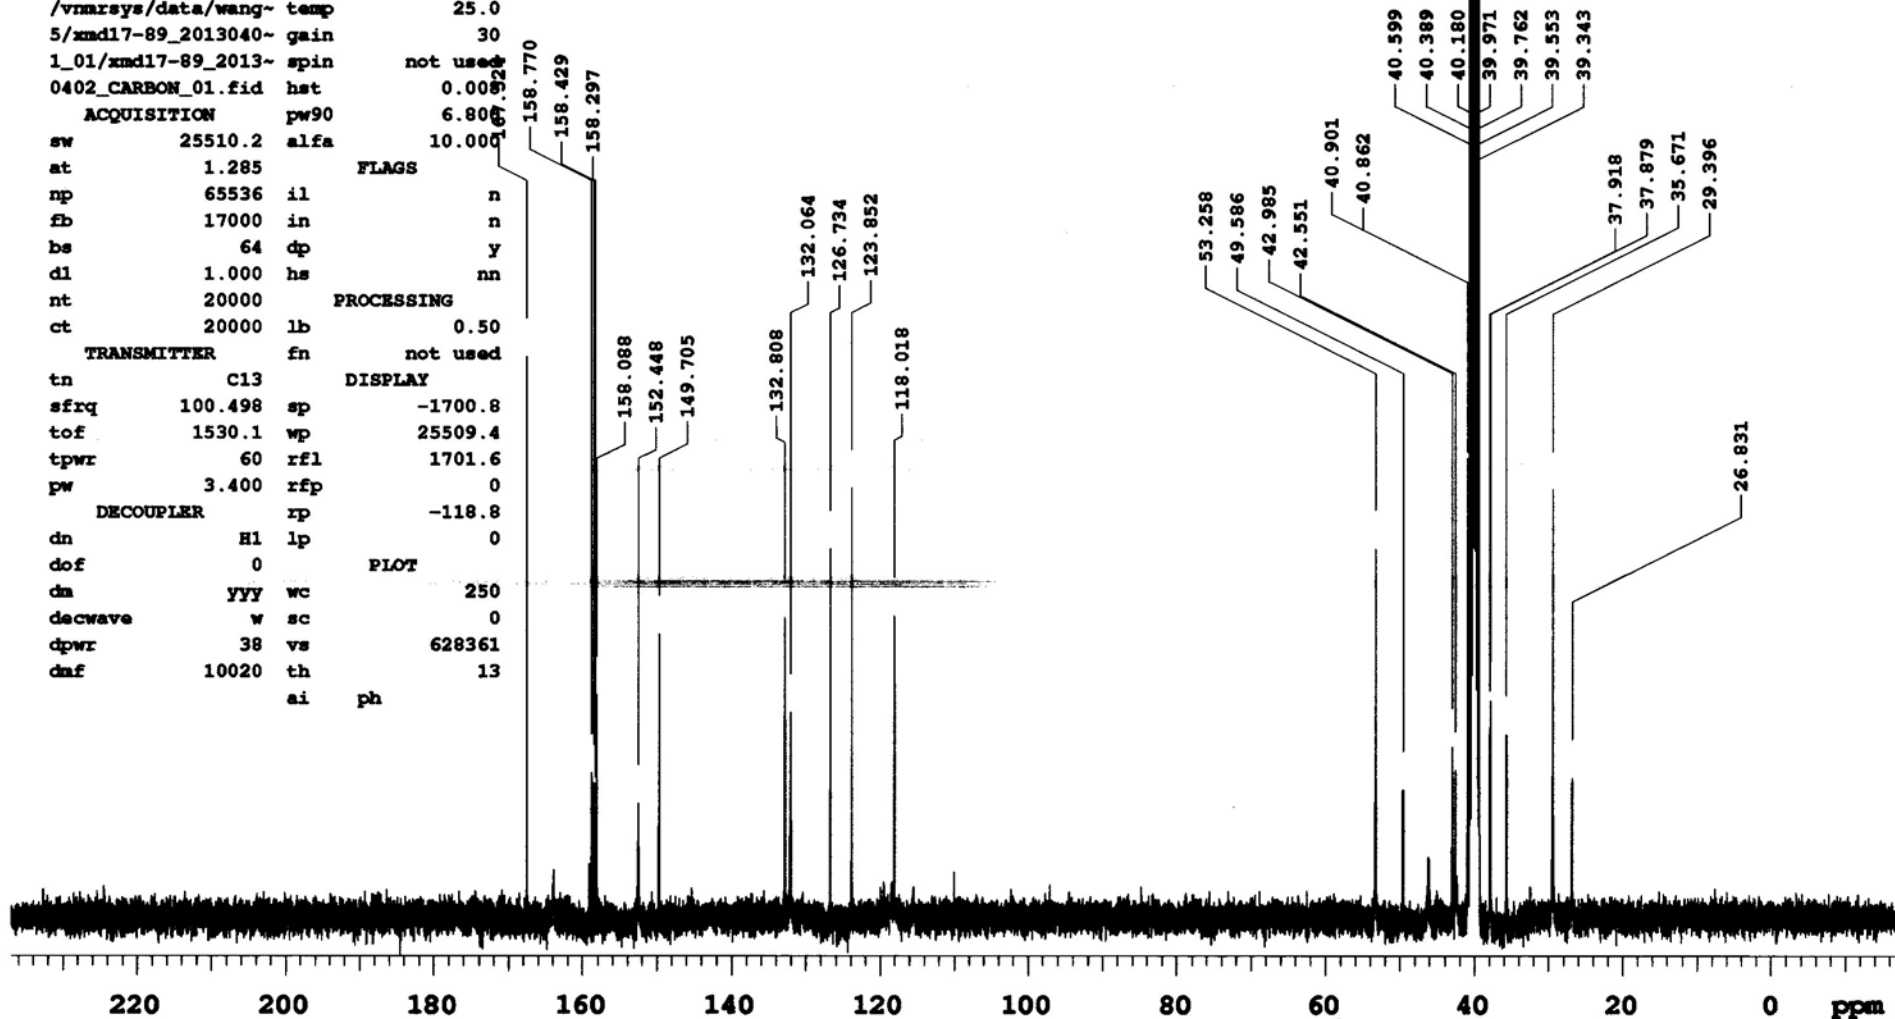

$^1\text{H}$  NMR for compound 12

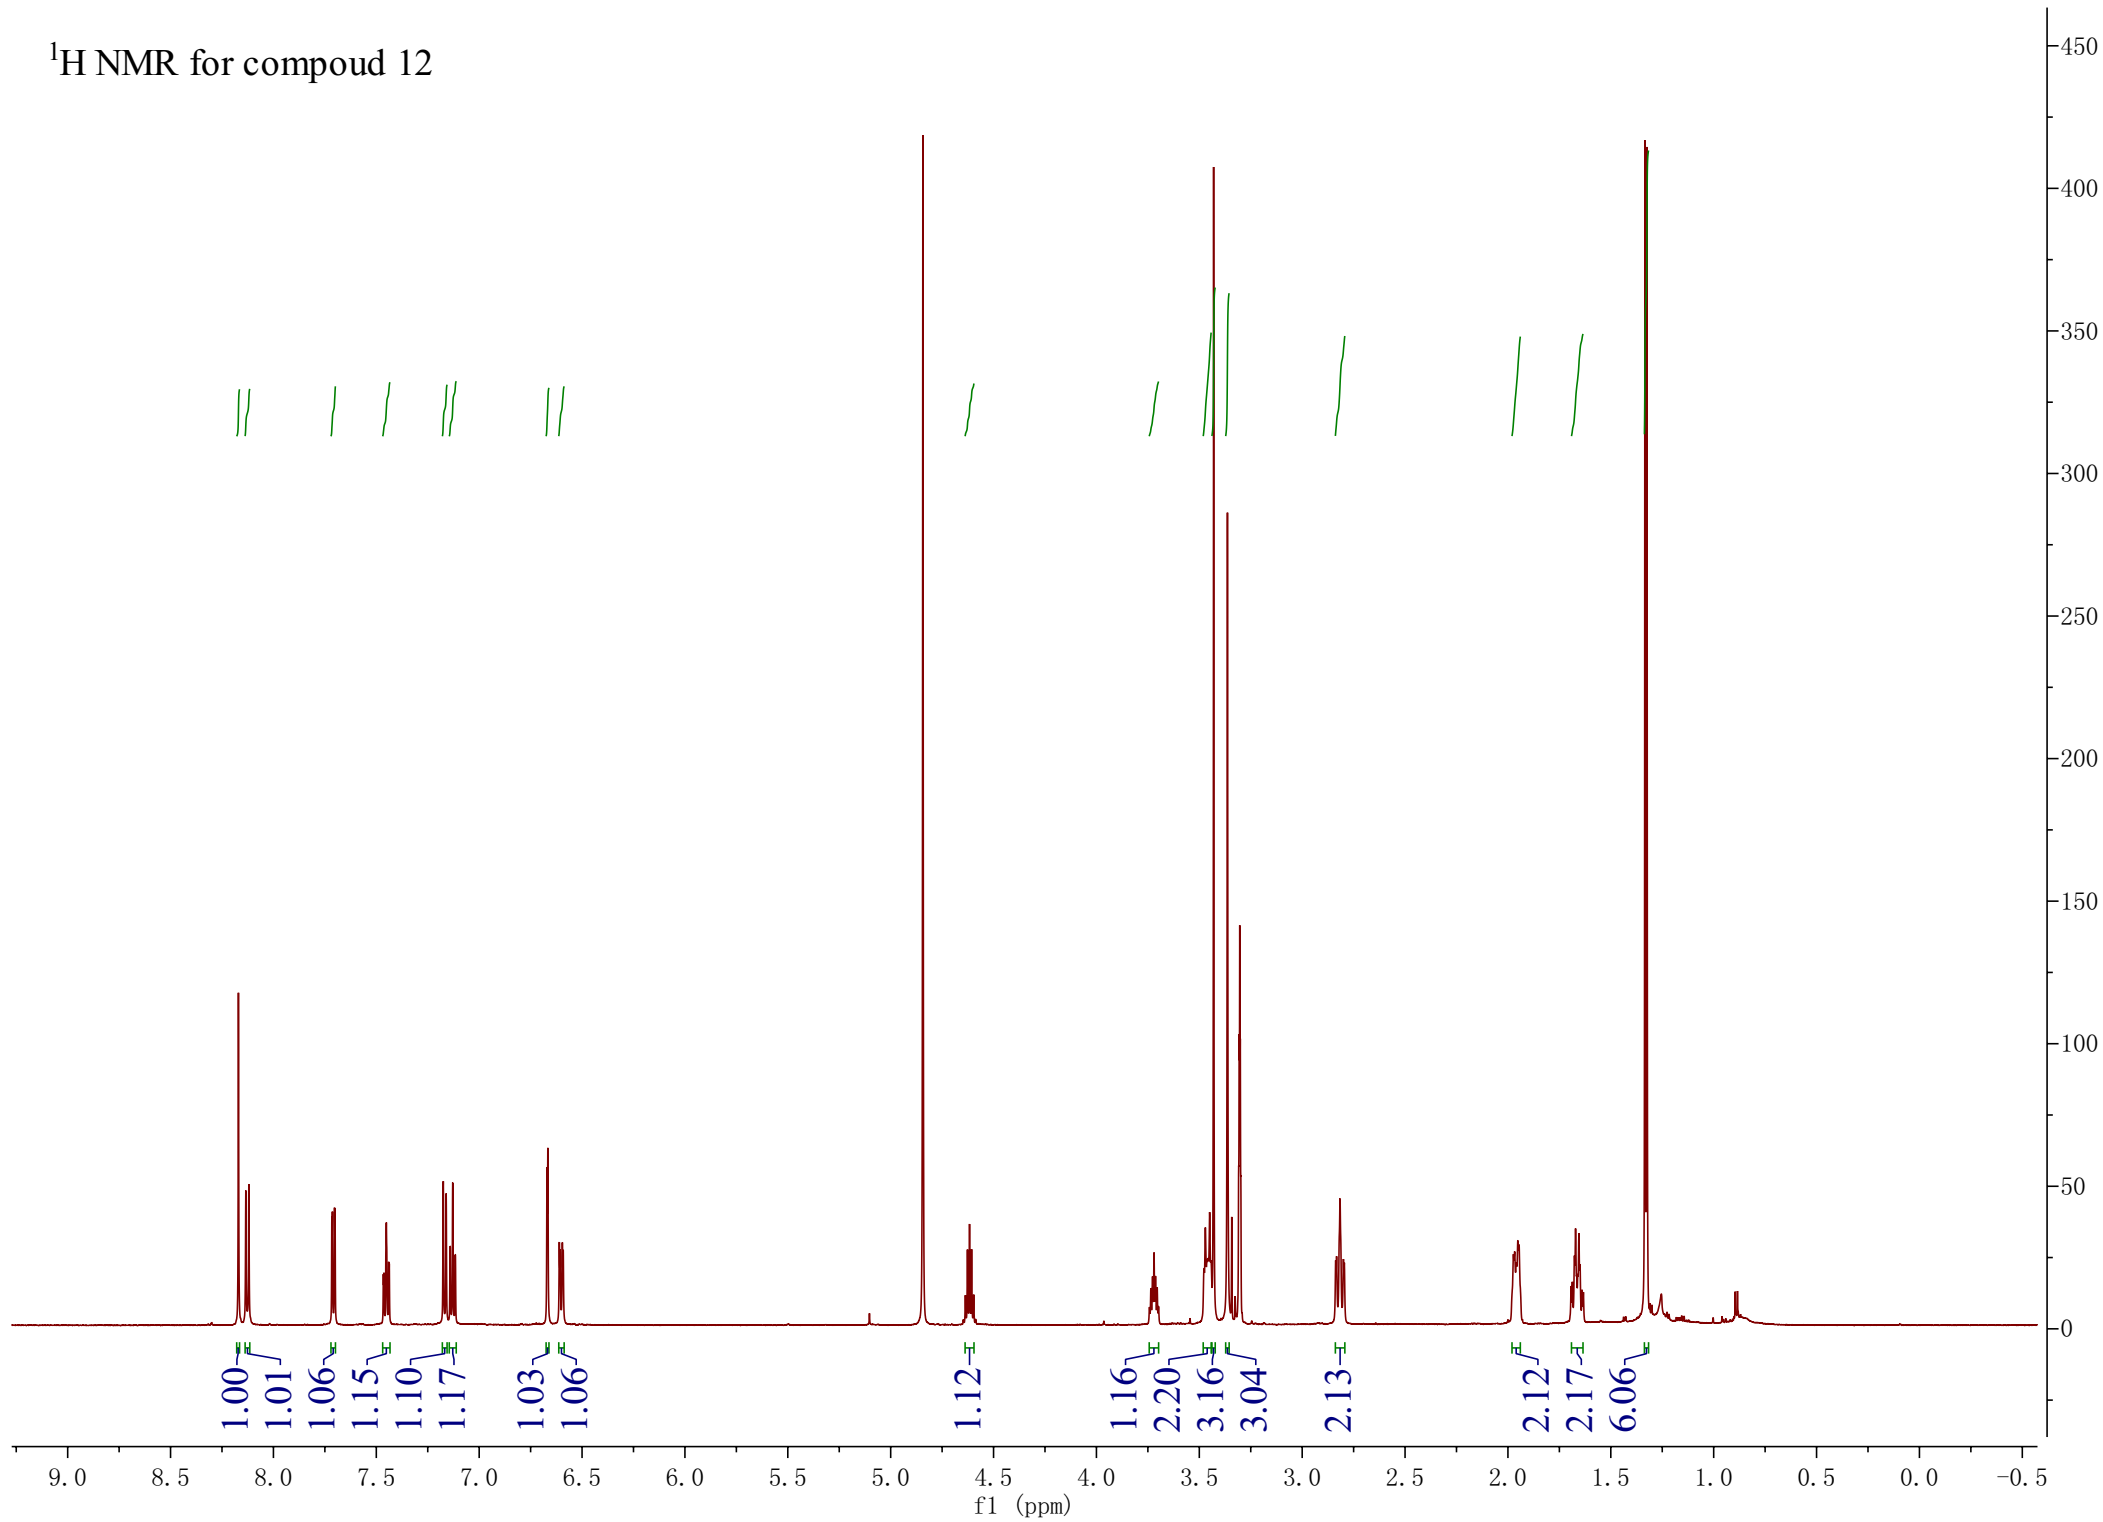

XMD8-86

expl CARBON

Compound 12

| SAMPLE              |                | PRESATURATION |          |
|---------------------|----------------|---------------|----------|
| date                | Mar 25 2013    | satmode       | n        |
| solvent             | dmsc           | wet           | n        |
| file                | /home/walkup1~ | SPECIAL       |          |
| /vnmrsys/data/wang~ | temp           | 25.0          |          |
| 5/XMD8-86_20130325~ | gain           | 30            |          |
| _01/XMD8-86_201303~ | spin           | not used      |          |
| 26_CARBON_01.fid    | hst            | 0.008         |          |
| ACQUISITION         |                | pw90          | 6.800    |
| sw                  | 25510.2        | alfa          | 10.000   |
| at                  | 1.285          | FLAGS         |          |
| np                  | 65536          | il            | n        |
| fb                  | 17000          | in            | n        |
| bs                  | 64             | dp            | y        |
| d1                  | 1.000          | hs            | nn       |
| nt                  | 10950          | PROCESSING    |          |
| ct                  | 10950          | lb            | 0.50     |
| TRANSMITTER         |                | fn            | not used |
| tn                  | C13            | DISPLAY       |          |
| sfrq                | 100.498        | sp            | -1700.8  |
| tof                 | 1530.1         | wp            | 25509.4  |
| tpwr                | 60             | rfl           | 1701.6   |
| pw                  | 3.400          | rfp           | 0        |
| DECOUPLER           |                | rp            | -120.4   |
| dn                  | H1             | lp            | 0        |
| dof                 | 0              | PLOT          |          |
| dm                  | yyy            | wc            | 250      |
| decwave             | w              | sc            | 0        |
| dpwr                | 38             | vs            | 450287   |
| dmf                 | 10020          | th            | 20       |
|                     |                | ai            | ph       |

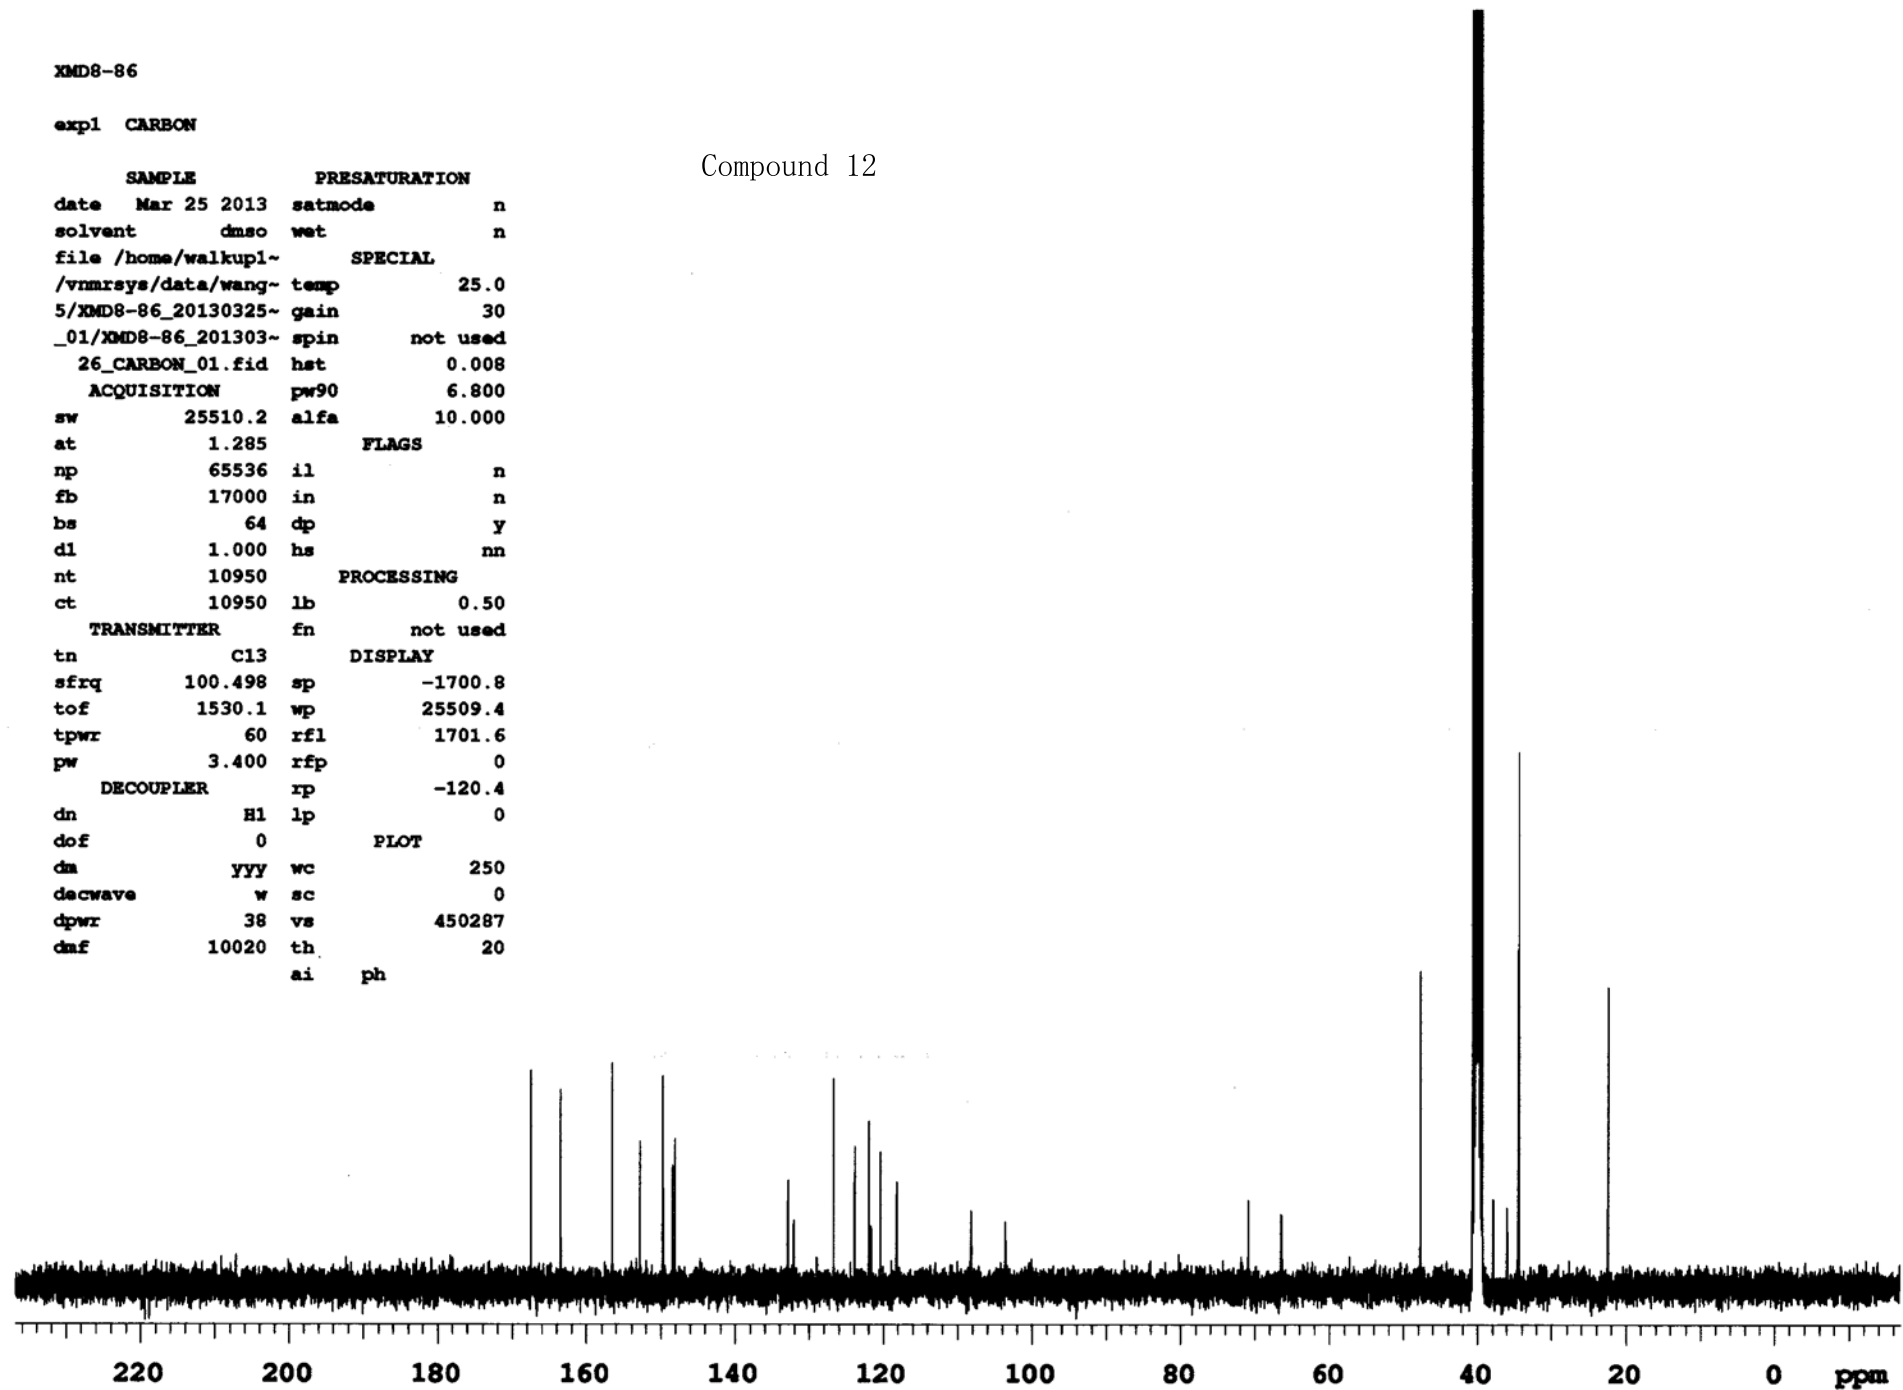

<sup>1</sup>H NMR for compound 24

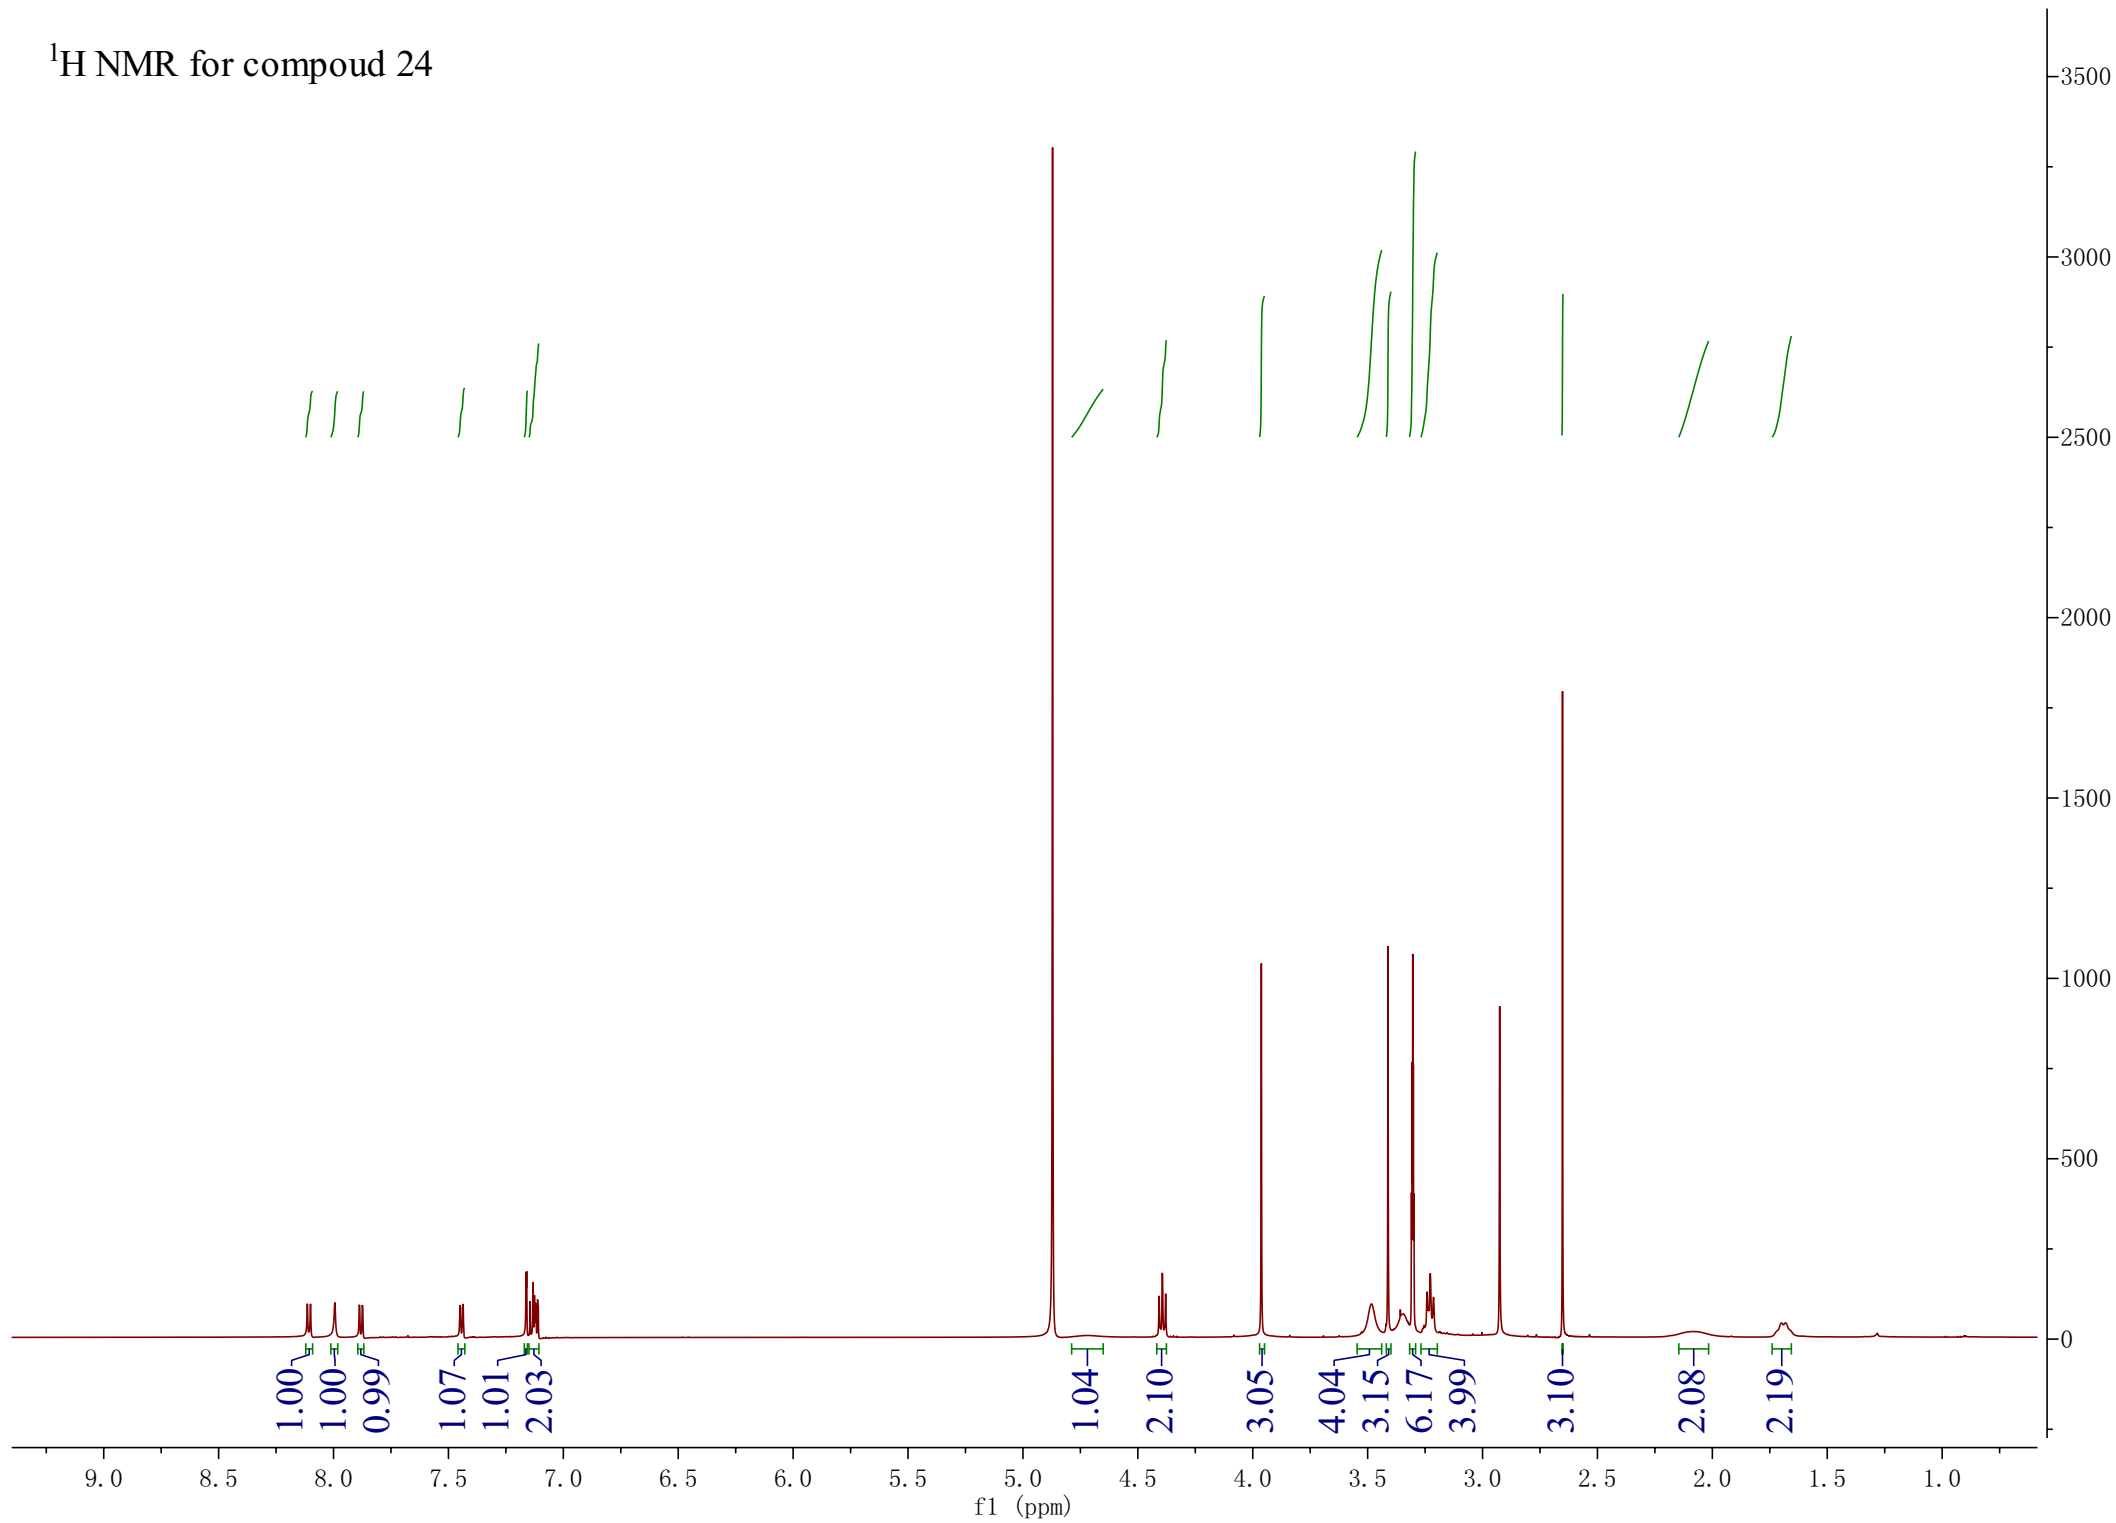

XMD16-44

Compound 24

expl CARBON

| SAMPLE              |                | PRESATURATION |             |
|---------------------|----------------|---------------|-------------|
| date                | Mar 27 2013    | satmode       | n           |
| solvent             | dmsd           | wet           | n           |
| file                | /home/walkup1- | SPECIAL       |             |
| /vnmrsys/data/wang~ | temp           | 25.0          |             |
| 5/XMD16-44_2013032~ | gain           | 30            |             |
| 7_01/XMD16-44_2013~ | spin           | not used      |             |
| 0328_CARBON_01.fid  | het            | 0.008         |             |
| ACQUISITION         | pw90           | 6.800         |             |
| sw                  | 25510.2        | alfa          | 10.000      |
| at                  | 1.285          | FLAGS         |             |
| np                  | 65536          | il            | n           |
| fb                  | 17000          | in            | n           |
| bs                  | 64             | dp            | y           |
| d1                  | 1.000          | hs            | nn          |
| nt                  | 21000          | PROCESSING    |             |
| ct                  | 21000          | lb            | 0.50        |
| TRANSMITTER         | fn             | not used      |             |
| tn                  | C13            | DISPLAY       |             |
| sfrq                | 100.498        | sp            | -1700.8     |
| tof                 | 1530.1         | wp            | 25509.4     |
| tpwr                | 60             | rfl           | 1701.6      |
| pw                  | 3.400          | rfp           | 0           |
| DECOUPLER           | rp             | -116.4        |             |
| dn                  | H1             | lp            | 0           |
| dof                 | 0              | PLOT          |             |
| dm                  | YYY            | wc            | 250         |
| decwave             | w              | sc            | 0           |
| dpwr                | 38             | vs            | 1.30586e+06 |
| daf                 | 10020          | th            | 19          |
|                     | ai             | ph            |             |

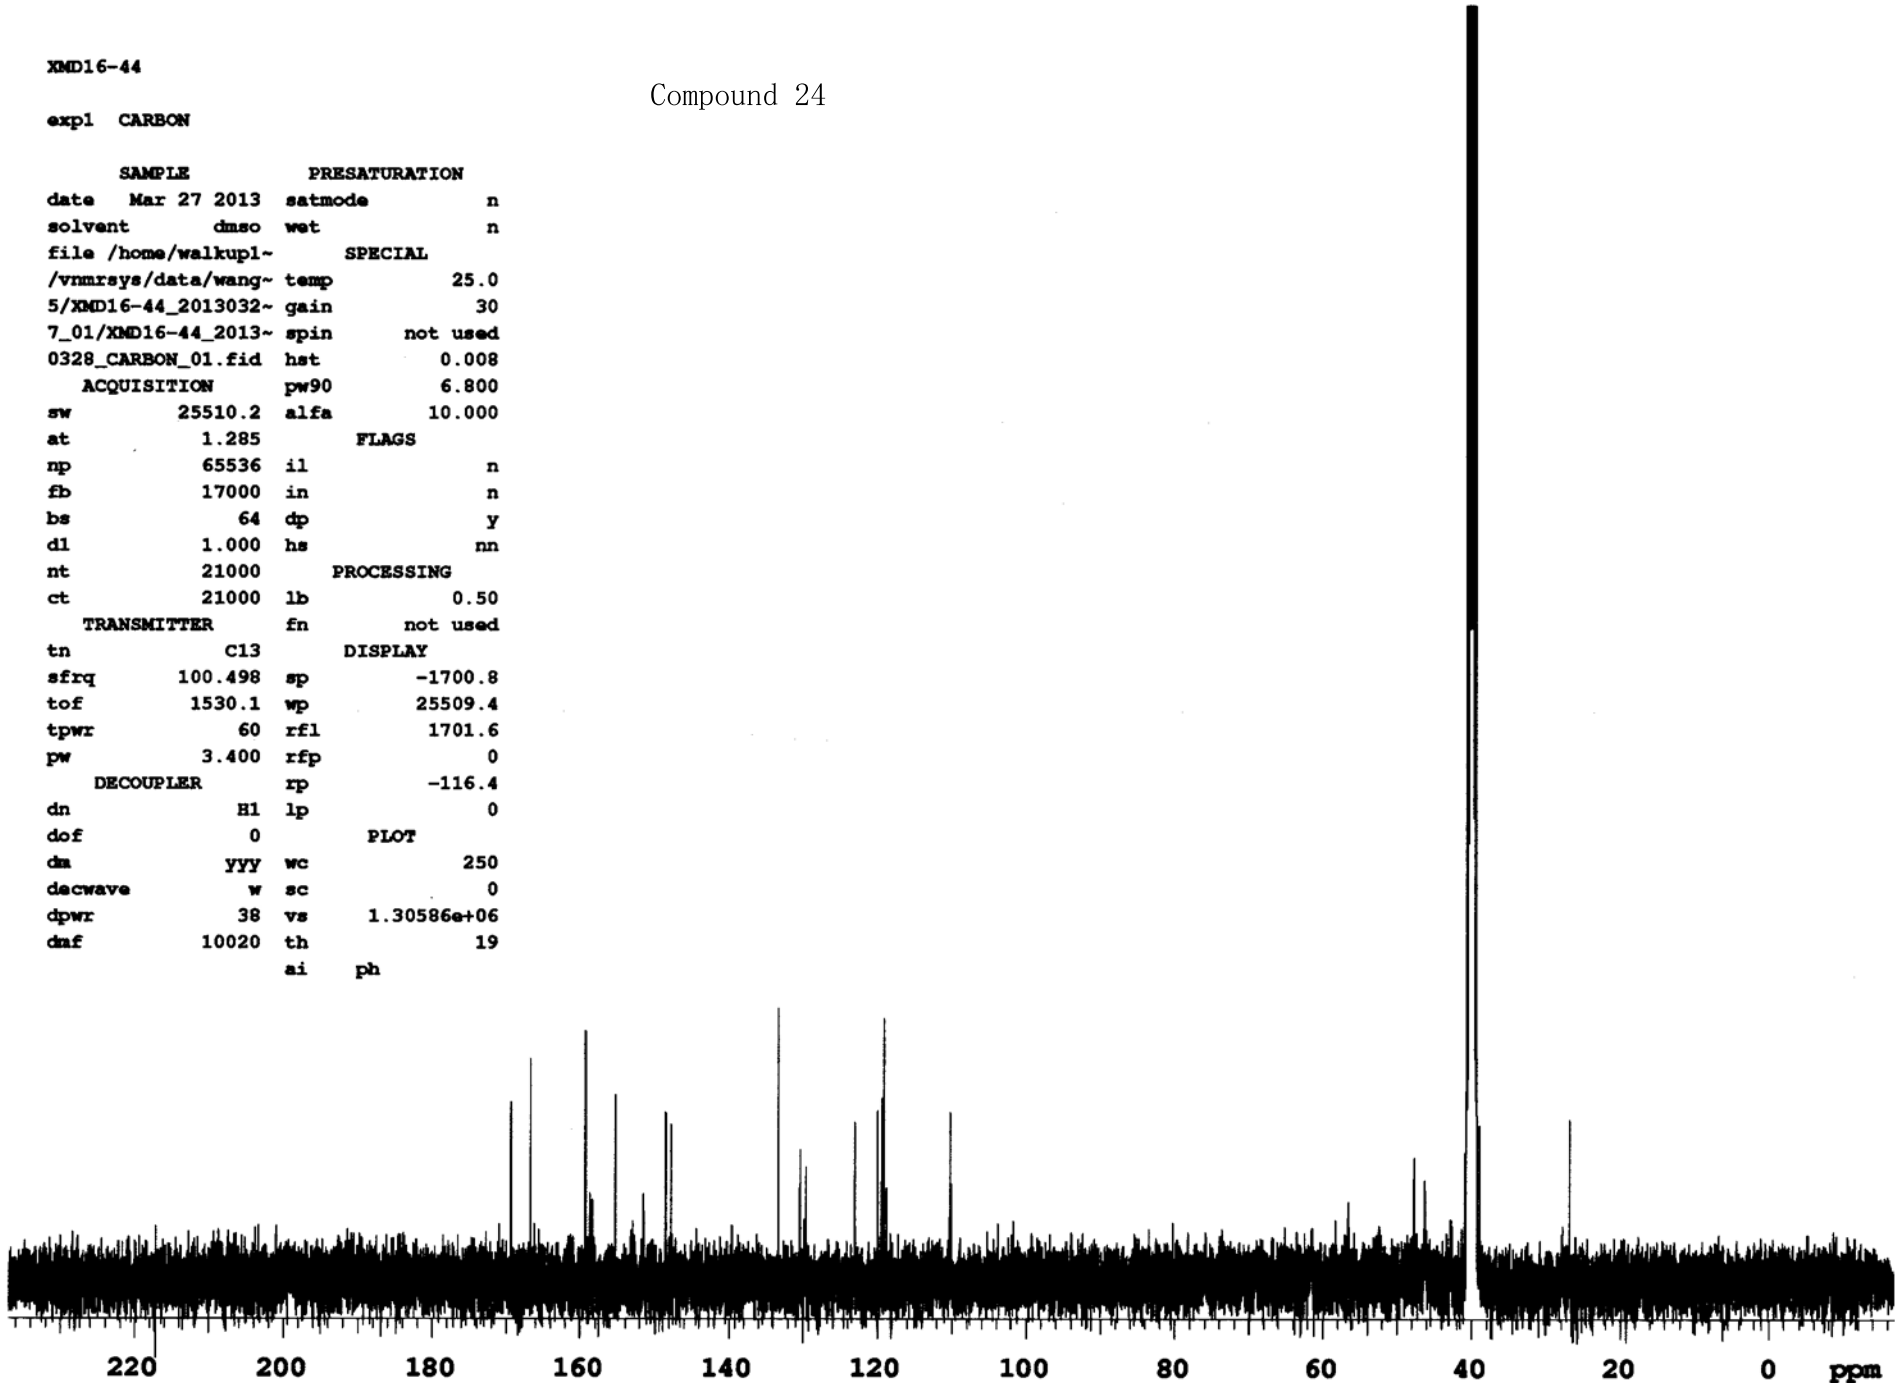



$^1\text{H}$  NMR for compound 26

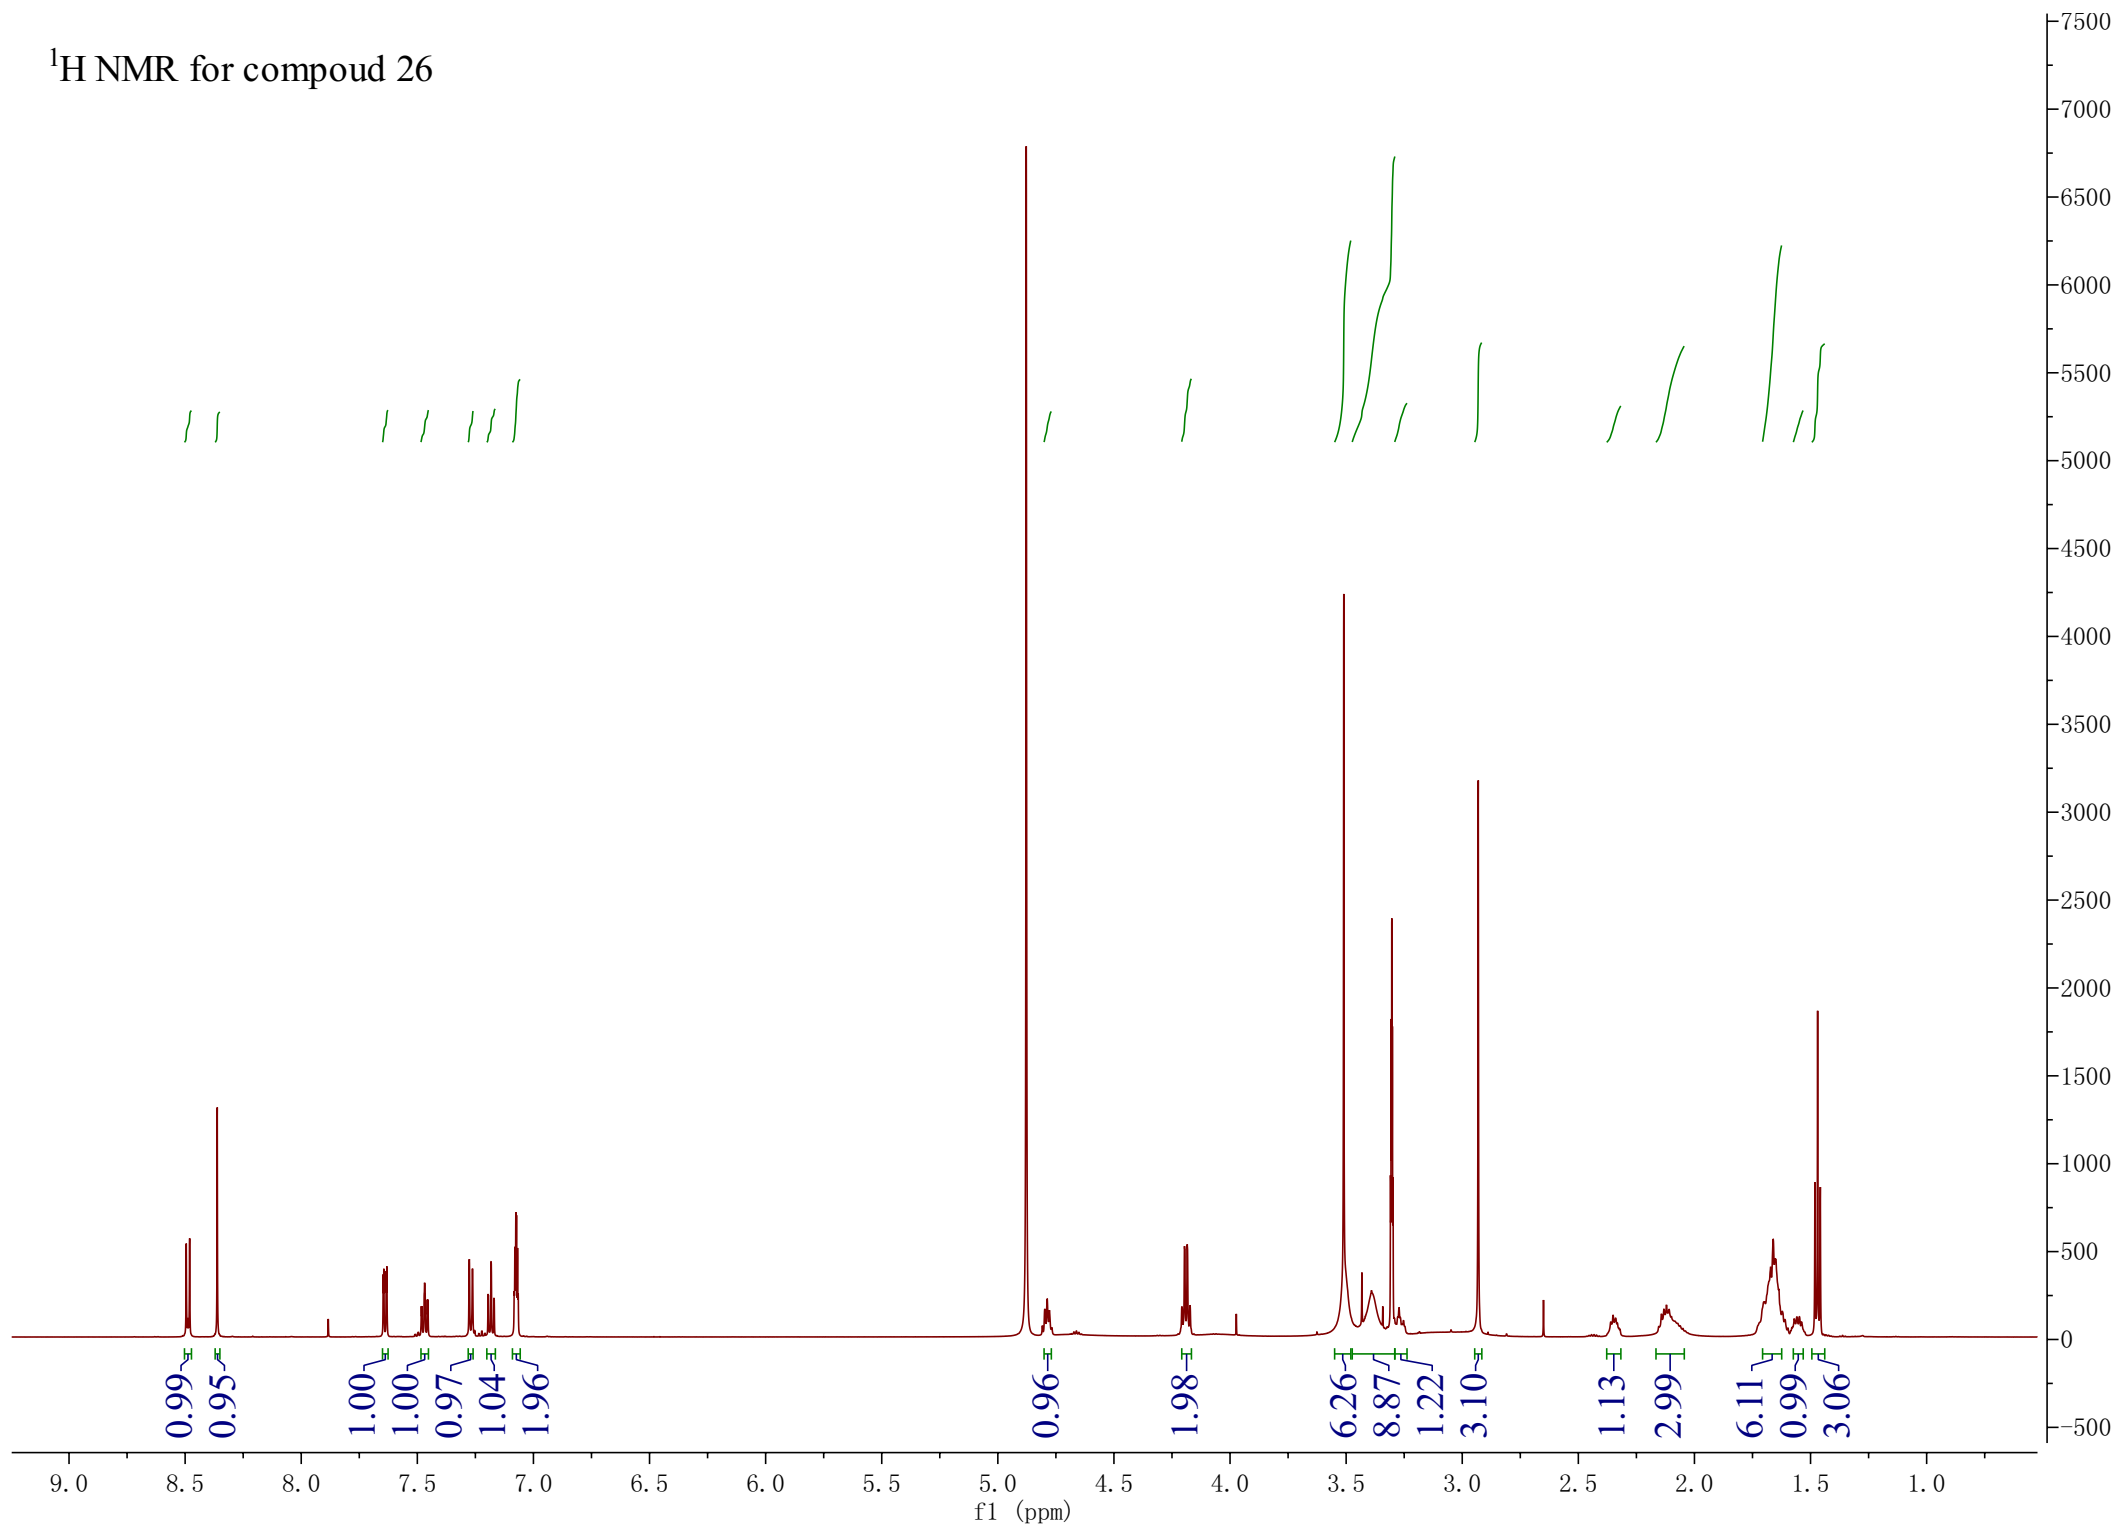

xmd17-109

expl CARBON

Compound 26

| SAMPLE              |                | PRESATURATION |          |
|---------------------|----------------|---------------|----------|
| date                | Mar 27 2013    | satmode       | n        |
| solvent             | dmsc           | wet           | n        |
| file                | /home/walkup1~ | SPECIAL       |          |
| /vnmrsys/data/wang~ | temp           | 25.0          |          |
| 5/xmd17-109_201303~ | gain           | 30            |          |
| 27_01/xmd17-109_20~ | spin           | not used      |          |
| 130327_CARBON_01.f~ | hst            | 0.008         |          |
|                     | id             | pw90          | 6.800    |
| ACQUISITION         | alfa           | 10.000        |          |
| sw                  | 25510.2        | FLAGS         |          |
| at                  | 1.285          | il            | n        |
| np                  | 65536          | in            | n        |
| fb                  | 17000          | dp            | y        |
| bs                  | 64             | hs            | nn       |
| d1                  | 1.000          | PROCESSING    |          |
| nt                  | 10500          | lb            | 0.50     |
| ct                  | 10500          | fn            | not used |
| TRANSMITTER         |                | DISPLAY       |          |
| tn                  | C13            | sp            | -1700.8  |
| sfrq                | 100.498        | wp            | 25509.4  |
| tof                 | 1530.1         | rf1           | 1701.6   |
| tpwr                | 60             | rfp           | 0        |
| pw                  | 3.400          | rp            | -116.7   |
| DECOUPLER           |                | lp            | 0        |
| dn                  | H1             | PLOT          |          |
| dof                 | 0              | wc            | 250      |
| dn                  | YYY            | sc            | 0        |
| decwave             | w              | vs            | 927209   |
| dpwr                | 38             | th            | 8        |
| dmf                 | 10020          | ai            | ph       |

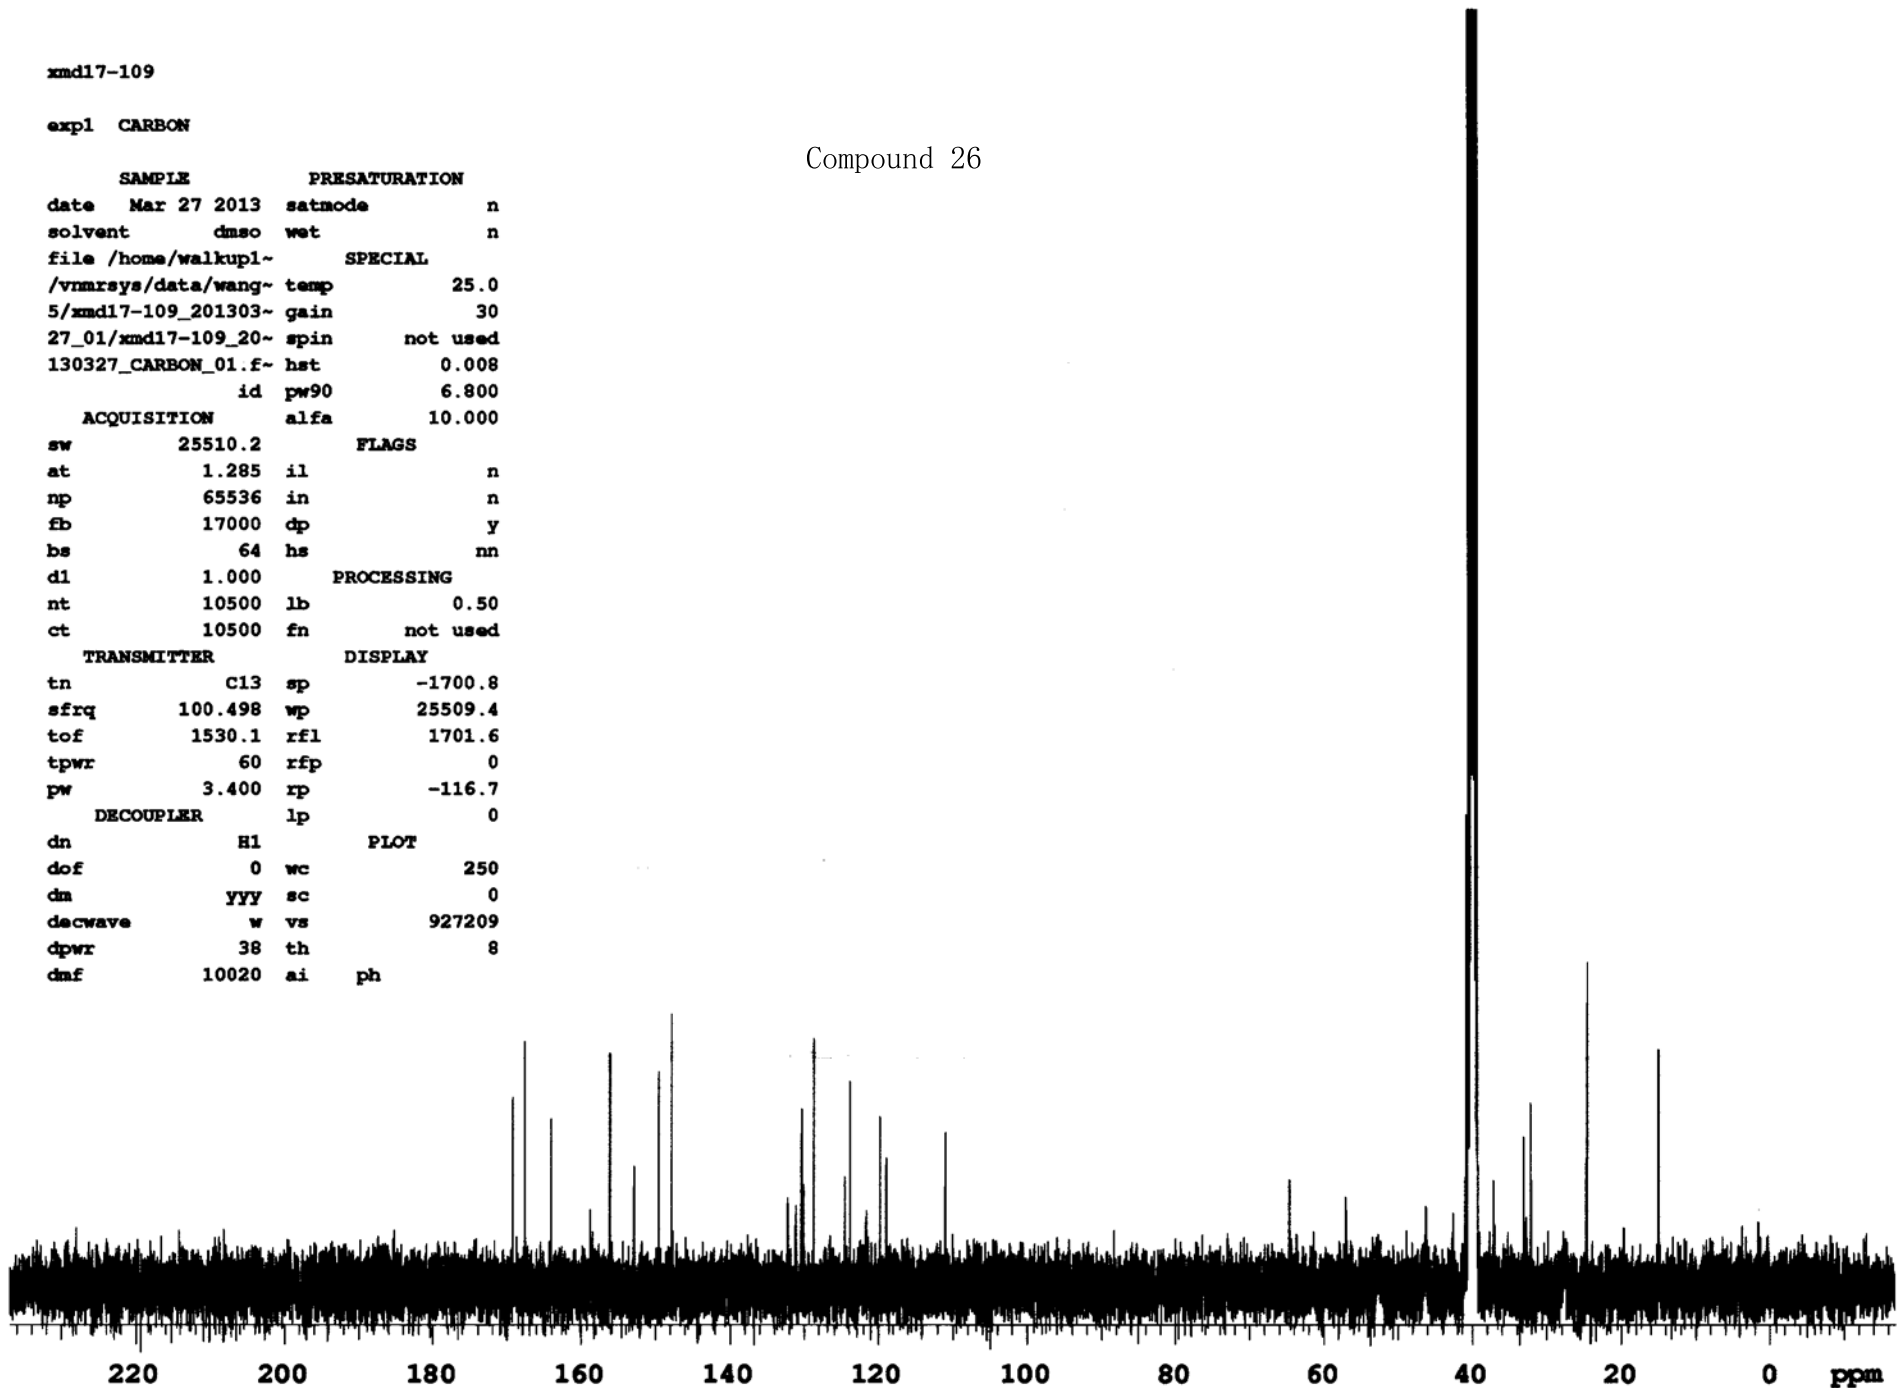

Supplement: mmc1.pdf [file mmc1.pdf]
